# 1 **Metabolic interactions underpinning high methane fluxes across terrestrial freshwater** 2 **wetlands**

3  
4 Emily Bechtold<sup>1</sup>, Jared B. Ellenbogen<sup>1</sup>, Jorge A. Villa<sup>2</sup>, Djennfyer K de Melo Ferreira<sup>1</sup>, Angela M. Oliverio<sup>1,3</sup>, Joel  
5 Kostka<sup>4</sup>, Virginia I. Rich<sup>5</sup>, Ruth K. Varner<sup>6</sup>, Sheel Bansal<sup>7</sup>, Eric J. Ward<sup>8</sup>, Gil Bohrer<sup>5</sup>, Mikayla A. Borton<sup>1</sup>, Kelly C.  
6 Wrighton<sup>1</sup>, Michael J. Wilkins<sup>1</sup>

7  
8 <sup>1</sup>Colorado State University, Fort Collins, CO; <sup>2</sup>University of Louisiana, Lafayette, LA; <sup>3</sup>Syracuse University,  
9 Syracuse, NY; <sup>4</sup>Georgia Institute of Technology, Atlanta, Georgia; <sup>5</sup>The Ohio State University, Columbus, OH;  
10 <sup>4</sup>University of New Hampshire, Durham, NH; <sup>7</sup>United States Geological Survey, Jamestown, ND; <sup>8</sup>University of  
11 Maryland, College Park, MD

12  
13 \*Co-Corresponding Authors: Michael J. Wilkins and Kelly C. Wrighton

14  
15 Email: Mike.Wilkins@colostate.edu and Kelly.Wrighton@colostate.edu

16  
17 **This draft manuscript is distributed solely for purposes of scientific peer review. Its content is deliberative**  
18 **and predecisional, so it must not be disclosed or released by reviewers. Because the manuscript has not yet**  
19 **been approved for publication by the U.S. Geological Survey (USGS), it does not represent any official USGS**  
20 **finding or policy.**

## 21 22 23 **Abstract**

24  
25 Current estimates of wetland contributions to the global methane budget carry high uncertainty,  
26 particularly in accurately predicting emissions from high methane-emitting wetlands.  
27 Microorganisms mediate methane cycling, yet knowledge of their conservation across wetlands  
28 remains scarce. To address this, we integrated 1,118 16S rRNA amplicon datasets (116 new),  
29 305 metagenomes (20 new) that yielded 4,745 medium and high-quality metagenome assembled  
30 genomes (MAGs; 617 new), 133 metatranscriptomes, and annual methane flux data across 9  
31 wetlands to create the Multi-Omics for Understanding Climate Change (MUCC) v2.0.0 database.  
32 This new resource was leveraged to link microbiome compositional profiles to encoded functions  
33 and emissions, with specific focus on methane-cycling populations and the microbial carbon  
34 decomposition networks that fuel them. We identified eight methane-cycling genera that were  
35 conserved across wetlands, and deciphered wetland specific metabolic interactions across  
36 marshes, revealing low methanogen-methanotroph connectivity in high-emitting wetlands.  
37 *Methanoregula* emerged as a hub methanogen across networks and was a strong predictor of  
38 methane flux, demonstrating the potential broad relevance of methylotrophic methanogenesis in  
39 these ecosystems. Collectively, our findings illuminate trends between microbial decomposition  
40 networks and methane flux and provide an extensive publicly available database to advance  
41 future wetland research.

## 50 INTRODUCTION

51 Methane (CH<sub>4</sub>) is a potent greenhouse gas (GHG) contributing to current atmospheric warming<sup>1</sup>.  
52 Despite accounting for less than 8% of the land coverage, natural wetlands represent the largest  
53 natural source of CH<sub>4</sub> and contribute between 20-50% of natural global CH<sub>4</sub> emissions<sup>2-4</sup>.

54 Forecasting CH<sub>4</sub> flux from wetlands remains challenging due to complex interactions between  
55 environmental variables such as temperature, soil moisture, and vegetation type, as well as the  
56 spatial and temporal variability of CH<sub>4</sub> emissions from wetlands<sup>3,5,6</sup>. Furthermore, the wide array  
57 of wetland ecosystems, encompassing peatlands, marshes, swamps, and floodplains, adds  
58 complexity to the accurate quantification of CH<sub>4</sub> emissions at a global scale, as each wetland  
59 potentially harbors distinct CH<sub>4</sub> production processes and emission rates.

60  
61 In the saturated soil conditions typical of wetlands, CH<sub>4</sub> generation occurs through an interactive  
62 microbial decomposition network that hydrolyzes and ferments plant polymeric material into  
63 smaller molecular weight compounds (Figure 1B). These compounds serve as substrates for  
64 methanogenic archaea, which utilize three distinct metabolic pathways defined by their substrate  
65 preference - hydrogenotrophic, acetoclastic, and methylotrophic - for CH<sub>4</sub> production<sup>7</sup>.  
66 Microbially derived soil CH<sub>4</sub> can subsequently be emitted to the atmosphere or undergo further  
67 microbial oxidation by aerobic or anaerobic methanotrophic bacteria<sup>8</sup>. While this decomposition  
68 framework is well-theorized<sup>9,10</sup>, the extent to which these microbial members, functional guilds,  
69 and overall trophic structure are conserved across different wetlands and their relationships to  
70 CH<sub>4</sub> emissions remain unclear.

71  
72 To bridge this knowledge gap, genome-resolved metagenomics has begun to unveil the identity  
73 and metabolic capabilities of microbial communities in wetland soils. This information has  
74 uncovered new methanogen and methanotroph genera<sup>11-14</sup>, pinpointed relevant functional  
75 pathways<sup>15-19</sup>, and provided insights into their spatial and temporal relevance<sup>20</sup>. Moreover,  
76 metagenomic data from three distinct wetlands<sup>9,10,21</sup> was leveraged to construct microbial carbon  
77 decomposition networks, highlighting the microbial guilds and their constituent members  
78 involved in CH<sub>4</sub> cycling within these specific sites. While these studies laid valuable  
79 groundwork, it is imperative to complement site-specific knowledge with broader-scale analyses  
80 for a more comprehensive understanding of wetland microbiomes.

81  
82 To address this broader sampling need, 16S rRNA gene amplicon sequencing characterizes  
83 bacterial and archaeal taxonomy and distribution across wetlands, albeit without providing  
84 functional content. This high throughput method allows for more extensive microbial sampling  
85 across wetland gradients, capturing microbial dynamics across wetland land coverage types,  
86 depth, and seasons<sup>17,22-24</sup>. Integrating knowledge from both marker gene analyses and  
87 metagenomics presents a unique opportunity to achieve comprehensive sampling of microbial  
88 conserved features, such as functional potential and network architecture across sites. Linking  
89 amplicon sequences to genomes from sampled wetland lineages would enable functional  
90 prediction, revealing the blueprints of complex wetland microbiomes at scale and transcending  
91 individual wetland boundaries.

92  
93 We adopted this integrated approach for enabling genomic functional predictions for marker  
94 gene identified taxa, to uncover features of soil wetland communities and their association to  
95 CH<sub>4</sub> flux across an array of freshwater wetlands. We first analyzed paired amplicon and CH<sub>4</sub> flux

96 data obtained from over a thousand samples collected across nine wetlands, representing a  
97 spectrum of CH<sub>4</sub> flux rates as well as ecological and climatic conditions. From this analysis,  
98 conserved wetland-wide microbial indicators were linked to a curated genomic catalog  
99 encompassing thousands of new and existing metagenome-assembled genomes (MAGS) from  
100 wetland soils. This cross-site endeavor revealed a core set of conserved wetland microorganisms,  
101 allowing us to elucidate the functional decomposition networks supporting their activity, and  
102 delve into the physiological drivers of specific methanogenic taxa associated with high CH<sub>4</sub>-  
103 emitting wetlands. This study offers a comprehensive, multi-site perspective on the  
104 microorganisms and processes dictating CH<sub>4</sub> dynamics in wetlands, thereby furnishing actionable  
105 insights for advancing scientific understanding and facilitating their translation and integration  
106 into climate-scale models.

107

## 108 **RESULTS AND DISCUSSION**

### 109 **Models that rely on abiotic factors have increased uncertainty in high methane-emitting** 110 **wetlands**

111 Estimates of wetland contributions to the global methane (CH<sub>4</sub>) budget often rely on ecosystem-  
112 scale models, which do not represent soil microbial metabolism, but instead use abiotic variables  
113 (like mean annual air temperature) to approximate environmental states conducive for soil  
114 carbon decomposition, methanogenesis, and methanotrophy<sup>20</sup>. A robust meta-analysis from 42  
115 freshwater wetlands showed that air temperature partially accounted for mean annual CH<sub>4</sub> fluxes,  
116 explaining 51% of the variance across sites<sup>25</sup>. This discrepancy between CH<sub>4</sub> flux predictions and  
117 observations for many wetlands hints at a potential role for microbial contributions in explaining  
118 these variations, a feature we sought to examine in more detail in this study.

119

120 To understand unifying microbial features across wetlands and how microbial and geochemical  
121 properties relate to CH<sub>4</sub> flux, we conducted a meta-analysis using data from both published and  
122 unpublished wetland soil samples. To qualify for inclusion in our study, sites had to have  
123 amplicon sequencing data from at least 12 samples obtained from a minimum of 2 sampling  
124 depths and have CH<sub>4</sub> flux measurements. From the original 42 wetlands<sup>25</sup> in the noted earlier  
125 study, we identified 16S rRNA gene amplicon microbial data for three of the sites (OWC, TW1,  
126 LA2), of which the amplicon data from LA2 is newly released in this study while OWC and TW1  
127 utilize previously published data<sup>10,27</sup>. We also expanded the dataset to include CH<sub>4</sub> flux, 16S  
128 rRNA gene amplicon, and temperature data from an additional 6 freshwater wetland sites (JLA,  
129 PPR7, PPR8, STM-fen, STM-bog, SPRUCE) (Supplemental Data 1). The incorporation of these  
130 additional sites reduced the predictive power of mean annual air temperature to explain 37% of  
131 the variability across sites (Figure 1A). Notably, the addition of sites with the highest CH<sub>4</sub> fluxes  
132 (PPR8, PPR7) (Fig. 1A & 1D) reveals the limitations of mean annual air temperature as a  
133 predictor of CH<sub>4</sub> flux in high emitting wetlands, such as Old Woman Creek (OWC) and those  
134 within the Prairie Pothole Regional complex (PPR).

135

136 We collated and analyzed microbial data from 1,112 samples (10% is newly released in this  
137 study) from 9 wetlands to demonstrate how incorporating knowledge of CH<sub>4</sub>-cycling  
138 microorganisms can contribute to improved predictive understanding of these ecosystems (Table  
139 S1, Table S2). Included data was derived from 5 marshes: Old Woman Creek (OWC), Prairie  
140 Potholes Region (PPR 7, PPR 8), AmeriFlux site US-LA2 (LA2), and AmeriFlux, site-ID US-  
141 Twt (TWI); 1 swamp: Jean Lafitte National Historical Park and Preserve (JLA); 2 bogs: Marcell

142 Experimental Forest (SPRUCE) and Stordalen Mire (STM-bog); and 1 fen: Stordalen Mire  
143 (STM-fen). To account for inter-study variability in depth fractions, we binned these samples  
144 into three categories: shallow (0-9 cm), mid (10-19 cm), and deep (20-39 cm) (Fig. 1C).

145  
146 Additionally, we supplemented these data with genomic information creating a cross-wetland  
147 genomic catalog, Multi-omics for Understanding Climate Change (MUCC) v2.0.0 database.  
148 Here we expanded the original MUCC v1.0.0 genomic catalog, which was composed of 42  
149 metagenome and 133 metatranscriptome samples obtained from a single, high CH<sub>4</sub> emitting  
150 marsh (OWC) (Figure 1A)<sup>10</sup>. The 2,507 medium and high-quality MAGs recovered from this  
151 wetland sampling were combined with 1,529 additional MAGs from previously published palusa,  
152 bog, and fen metagenomes from a permafrost thaw gradient at Stordalen mire (STM, Figure  
153 1A)<sup>9</sup>. Additionally, we added 50 publicly available MAGs derived from the PPR complex<sup>28</sup> and  
154 43 publicly available MAGs from TWI<sup>27</sup>. Finally, we included 20 new metagenomes from the  
155 PPR complex, LA2, and JLA (349 Gbp of new sequencing), resulting in 617 MAGs released as  
156 new data as part of this study. In total MUCC 2.0 contains 3,634 high and medium quality,  
157 dereplicated (99% genome identity) MAGs derived from six wetland complexes totaling 8.9 Tb  
158 of sequence data (Table S3). MUCCv2.0.0 compiles previous wetland genomic datasets and  
159 expands genome representation across wetland soils spanning diverse geographies, ultimately  
160 increasing database read recruitment and reducing the computational requirements for translating  
161 reads to functional content. This wetland specific genomic resource database was used to connect  
162 microbial community profiles with functional potential.

163  
164  
165 **High CH<sub>4</sub>-emitting wetlands share microbial community composition and structure**

166 Analyses across wetland sites revealed that wetland type, not geographical location,  
167 corresponded to microbial community composition and diversity. As might be expected by  
168 ecological wetland differences, bog samples derived from Sweden (STM) and Minnesota  
169 (SPRUCE), were more alike one another than bog and fen samples collected within the same  
170 wetland complex (STM). Wetlands categorized as marshes or swamps had higher bacterial and  
171 archaeal alpha diversity, higher pH, and higher CH<sub>4</sub> flux than bog and fen sites (Fig. S1).  
172 Additionally, wetland type had a significant impact on community composition, and separation  
173 of communities was linked to pH (Figure 2A & S2, PERMANOVA,  $p < 0.001$ ). Notably,  
174 communities in bogs with the lowest pH and CH<sub>4</sub> flux were most distinct from marsh/swamp  
175 communities with the highest pH and CH<sub>4</sub> fluxes. Fens, with intermediate characteristics of bogs  
176 and marshes/swamps such as pH, vegetation, and nutrient levels, hosted microbial communities  
177 that were similarly intermediate of the bog and marsh communities<sup>29</sup>.

178  
179 CH<sub>4</sub> flux was loosely correlated with temperature across wetland types but this trend was absent  
180 at the level of individual wetland types. In marshes and swamps – the highest CH<sub>4</sub> emitting  
181 wetland types – no correlation to temperature was observed ( $R^2=0.17$ ,  $p=0.16$ ) (Fig. S3A),  
182 suggesting that other factors may be important for predicting CH<sub>4</sub> flux<sup>3,30</sup>. We next assessed the  
183 relationships between CH<sub>4</sub> flux and CH<sub>4</sub>-cycling microbial community members including  
184 methanogens and methanotrophs across sites. Bog and marsh sites hosted different methanogen  
185 communities (Fig. S4), with bog sites characterized by dominance of a few methanogens and low  
186 relative abundances of acetoclastic methanogens<sup>3,31,32</sup>. For example, *Methanotherix*, an obligate  
187 acetoclastic methanogen was significantly more enriched in fen, marsh, and swamp samples than

188 in bog samples. Overall, marsh and swamp sites contained a higher diversity and evenness of  
189 methanogen taxa and functional types. Collectively, the functional potential to utilize more  
190 diverse methanogenic substrates in high CH<sub>4</sub> emitting marsh sites could contribute to higher CH<sub>4</sub>  
191 fluxes.

192  
193 To fully understand microbial contributions to the methane cycle, we also assessed the  
194 distribution of methanotroph communities across wetland types. Across all sites aerobic  
195 methanotrophs were dominant, while the anaerobic methanotrophs assigned to the genus  
196 *Methanoperedens* were enriched only in the three highest methane emitting sites (OWC, PP7,  
197 PP8) (Figure S4). We found that the diversity of methanogens ( $R^2=0.5$ ,  $p=0.034$ ), but not  
198 methanotrophs ( $R^2=0.22$ ,  $p=0.2$ ), was significantly correlated to CH<sub>4</sub> flux (Fig S3B).  
199 Additionally, the ratio of methanogen to methanotroph relative abundances was correlated to  
200 flux ( $R^2=0.45$ ,  $p=0.047$ ) (Fig S3C), but the relative abundance of methanogens and  
201 methanotrophs alone was not. This suggests the coupling of methanogens and methanotrophs act  
202 as a control over CH<sub>4</sub> flux in wetland environments, highlighting how the balance between these  
203 microbial groups likely influences net methane emissions.

### 204 205 **Identification of a widespread, core group of CH<sub>4</sub> cycling organisms**

206 Given more consistent sampling methodology (i.e., similar sequencing protocols), as well as the  
207 higher measured CH<sub>4</sub> fluxes, we focused on understanding trends in microbial dynamics across 5  
208 marsh and swamp sites (JLA, LA2, OWC, PPR7, and PPR8) (see methods). We first assessed  
209 occupancy patterns across sites to identify if there were core methanogens and methanotrophs for  
210 these marsh samples, identifying five methanogens and four methanotrophs detected in at least  
211 one sample from each site<sup>33</sup> (Fig. 2B). Despite wetland differences in site, depth, and time of  
212 year sampling (Figure 1), five core methanogen genera were found in a majority of samples:  
213 *Methanothrix* (79.7%), *Fen 33* (order *Methanomassiliicoccales*) (72.6%), *Methanobacterium B*  
214 (50.9%), *Methanolinea* (55.5%), and *Methanoregula* (93.9%). Interestingly, each methanogenic  
215 pathway (hydrogenotrophic, acetoclastic, methylotrophic methanogenesis) was represented  
216 within the core community, indicating that all three pathways are consistently important and  
217 likely utilized for wetland CH<sub>4</sub> production in high emitting marsh and swamp ecosystems (Fig.  
218 2B). Three methanotrophs were identified as core but were found in a lower percentage of  
219 samples: *Methylomonas* (60.3%), *Methylobacter* (39.8%), and *Methylomonadaceae KS41*  
220 (85.4%). However, because the core methanotrophs require oxygen for methane oxidation, these  
221 methanotrophs may not be as detectable in the deeper anoxic samples sampled here.

222 Constraining our analyses to only the top 10 centimeters of sediment where oxygen might be  
223 more available, we found *Methylomonas* present in 75.1%, *Methylobacter* in 57.1%, and *KS41* in  
224 95.2% of samples. Core microbiomes have become increasingly viewed as important because of  
225 their assumed role as critical to a given ecosystems' functioning<sup>34,35</sup>. Collectively, these  
226 discoveries underscore the pivotal role of select organisms in actively shaping the methane cycle  
227 within freshwater marsh ecosystems. These insights carry implications for forthcoming research  
228 activities, highlighting these organisms as candidates for more thorough physiological validation  
229 and study, as well as focus organisms for scaling to modeling endeavors.

### 230 231 **MUCC database enables deeper insight into trophic patterns from co-occurrence networks**

232 For each of the 5 marsh sites, we performed network analysis based on co-occurrence patterns to  
233 help unravel possible microbial interactions within these complex, methanogen-oriented



234 communities. We hypothesized that methanogen network structure in wetland communities  
235 would act as a predictor of CH<sub>4</sub> flux. To test this hypothesis, we built 16S rRNA gene positive  
236 co-occurrence networks at each site using both the community-wide amplicon data and only the  
237 methanogen community data (Figure S5).

238  
239 Although network structure of the entire community did not relate to CH<sub>4</sub> flux (Figure 3K), a  
240 more constrained network comprising the significant co-occurrences that included a methanogen  
241 member did uncover important trends (Figure 3L). These networks revealed a negative  
242 correlation between the number of methanogen-related network nodes and CH<sub>4</sub> flux, indicating a  
243 relationship between less complex methanogen networks and higher annual CH<sub>4</sub> emissions.  
244 Furthermore, the number of methanotrophs associated with methanogens in these networks was  
245 greater in the lower methane emitting sites (JLA, LA2), indicating that lower CH<sub>4</sub> fluxes are  
246 associated with communities where methanotrophs and methanogens co-occur. In contrast, while  
247 high CH<sub>4</sub>-emitting sites (OWC, PPR7, PPR8) host methanotrophs and methanogens, they were  
248 generally linked by fewer connections (Figure 3M). Methanotrophs can act as a filter, oxidizing  
249 anywhere from 20-60% of the CH<sub>4</sub> before it is released into the atmosphere<sup>3,36,37</sup> and these  
250 results indicate that their absence in wetland samples where methanogens are present could  
251 contribute to greater CH<sub>4</sub> fluxes.

252  
253 To determine potential metabolic interactions that underpin CH<sub>4</sub> production across these sites,  
254 we developed metabolic profiles for methanogen-connected taxa in our 16S rRNA gene  
255 networks. Utilizing the MUCC 2.0.0 database, we linked microbes present in the networks with  
256 MAG representatives and assigned them functional categories: obligate fermenter,  
257 homoacetogen, demethylating, or none of these three criteria (Fig. 3A-E, 4 & Table S4. We  
258 selected these criteria, as they are thought to cross feed methanogens (Figure S1, Data Table) and  
259 are traits that can be inferred from genomes clearly. Methanogen networks were composed of  
260 699 unique co-associated genera, of which 131 genera had a genome representative in the  
261 MUCC database (Figure 4). Summarizing these genome representatives within the methanogen  
262 networks, 12 were categorized as methanogens, 7 as methanotrophs, 23 as obligate fermenters, 8  
263 as homoacetogens, 1 as both obligate fermenter and homoacetogen, and 75 demethylating  
264 (methyl-x), and 4 did not meet these criteria (Rules for assignment are found in Table S4).  
265 Additionally, 6 methanogens and 10 methanotrophs identified based on 16S rRNA gene  
266 taxonomy alone (no matches to MUCC, but metabolism is defined in literature) were included in  
267 the networks (Fig. 4, Table S5).

268  
269 Specifically, obligate fermenters have the potential to produce acetate, formate, and H<sub>2</sub>, which  
270 we hypothesized would directly promote methanogen activity<sup>38,39</sup> and thus be positively  
271 associated with our methanogen networks. As we expected, obligate fermenters were highly  
272 connected to hydrogenotrophic and acetoclastic methanogens, likely supporting cross feeding. In  
273 total, obligate fermenters had 99 significant interactions with methanogens of which 73% were to  
274 hydrogenotrophic or acetoclastic methanogens (Fig. 3F-J). Additionally, obligate fermenters  
275 were found to highly co-occur with certain methylotrophic methanogens such as  
276 *Methanofastidiosum*, which requires H<sub>2</sub> to reduce methylated thiol to form methane. Compared  
277 to hydrogenotrophic methanogenesis, this form of methanogenesis is more thermodynamically  
278 favorable under low H<sub>2</sub> conditions and has been proposed to support H<sub>2</sub> producing syntrophs and

279 fermenters by preventing accumulation of H<sub>2</sub><sup>12</sup>. In summary, anoxic carbon exchanges between  
280 obligate fermenters and methanogens appear vital to carbon cycling in wetlands.

281  
282 Syntrophy denotes a symbiotic interaction among diverse microorganisms, wherein the exchange  
283 of metabolic byproducts mutually supports each organism's metabolism. This phenomenon is  
284 particularly prominent in methanogenic environments, where methanogens play a crucial role in  
285 regulating product concentrations, thereby rendering otherwise endergonic processes  
286 thermodynamically favorable<sup>40</sup>. In our study, we investigated obligate fermenters to uncover  
287 evidence of secondary fermentative syntrophs, identifying two prevalent syntrophic genera  
288 across methanogen networks: *Smithella*, present in four marshes except PPR8, and  
289 *Syntrophorhabdus*, found across all five marsh networks. Previous research has demonstrated the  
290 capacity for acetate and hydrogen production by *Syntrophorhabdus*, aligning with our genome-  
291 based characterization of these 7 MAGs in MUCC. Notably, in our networks, *Syntrophorhabdus*  
292 exhibited multiple (8) connections to hydrogenotrophs and acetoclasts, further emphasizing its  
293 role in metabolic exchanges. These genomic metabolic insights highlight the intricate  
294 connections harbored within these co-association networks, exchanges essential for maintaining  
295 metabolic efficiency in methanogenic environments.

296  
297 Homoacetogens are also interacting with methanogens, as these microorganisms grow on  
298 H<sub>2</sub>/CO<sub>2</sub>/CO and produce acetate as the main metabolic product. We hypothesized that these  
299 organisms could cross-feed acetoclastic methanogens<sup>15</sup> and or could compete with  
300 hydrogenotrophic methanogens for substrates<sup>41</sup>. The 9 homoacetogen MAGs identified in the  
301 methanogen networks comprised 15 nodes and were closely related across sites, belonging to  
302 two main phyla, Desulfobacterota and Chloroflexota despite many other acetogens across other  
303 phyla existing in the MUCC database. We observed 32 associations between these acetogens and  
304 methanogens, with 50% to hydrogenotrophic, 28% to acetoclastic and 22% to methylotrophic  
305 methanogens. Additionally, 6 of the 8 acetoclastic methanogens had at least one connection to an  
306 acetogen, supporting our hypothesis that acetogens were cross-feeding methanogens. While our  
307 finding does not preclude competition between hydrogenotrophs and other acetogens, these  
308 identified positive associations may reflect sufficient hydrogen production within the soil profile  
309 to support co-existence of both guilds, or the separation of guilds across microsites.

310  
311 Finally, demethylating microorganisms, whether bacteria or archaea, are capable of removing  
312 methyl groups from oxygen, sulfur, and nitrogen (O, S, N) containing compounds. Unlike  
313 methylotrophic methanogens, these taxa do not produce methane directly; however, they may  
314 engage in cross-feeding or competition dynamics with methylotrophic methanogens. Depending  
315 on the enzymatic systems they encode, these microorganisms can lead to several outcomes: (i)  
316 production of trimethylamine (TMA), a substrate for certain methanogens; (ii) formation of  
317 quaternary amines (QA), which can be utilized by select methylotrophic methanogens; or  
318 (iii) direct utilization of methylated O, N, or S compounds, which may (iiia) compete with  
319 methylotrophic methanogens or (iiib) generate acetate and hydrogen to support hydrogenotrophic  
320 or acetoclastic methanogens. The methyl-metabolism category exhibited substantial connectivity  
321 with methanogens, comprising nearly half of the connections across sites. Notably, 68% of these  
322 connections (comprised mostly of type iii demethylating microorganisms) were linked to  
323 acetoclastic and hydrogenotrophic methanogens not methylotrophs suggesting that  
324 demethylating metabolisms in soils could indirectly bolster non-methylotrophic methane

325 production. These findings underscore the complexity of microbial interactions beyond methane  
326 production and oxidation, thereby contributing to a more comprehensive understanding of  
327 microbial cross-feeding and its broader implications for methane emissions.  
328

### 329 ***Methanoregula* is critical for CH<sub>4</sub> production in wetlands**

330 Two core methanogens (Figure 2), *Methanotherix* and *Methanoregula*, were found in networks  
331 across every marsh indicating global importance in the wetland CH<sub>4</sub> cycle. *Methanotherix* is an  
332 obligate acetoclastic methanogen already shown to be globally distributed and an important  
333 contributor to CH<sub>4</sub> emissions in wetlands<sup>16</sup>. *Methanoregula* has been found in wetlands and other  
334 habitats around the world, and like at many of our sites, is a prominent member of methanogenic  
335 networks and consistently a dominant methanogen<sup>42,43</sup>. We found that its dominance (proportion  
336 of methanogens that are *Methanoregula*) was related to CH<sub>4</sub> flux, such that percent of  
337 methanogens that are *Methanoregula* significantly correlated to CH<sub>4</sub> flux and the residual values  
338 that were not well predicted from the temperature- CH<sub>4</sub> flux correlation in Figure 1 (Figure 5A).  
339 Additionally, we tested how well temperature, *Methanoregula* dominance, and the two combined  
340 explained methane flux. When looking at the 9 study sites, CH<sub>4</sub> flux was not predicted by  
341 temperature alone ( $R^2=0.15$ ,  $p=0.30$ ), was predicted by *Methanoregula* dominance ( $R^2=0.54$ ,  
342  $p=0.02$ ), but that temperature combined with *Methanoregula* dominance was the best predictor  
343 ( $R^2=0.84$ ,  $p=0.02$ ). This is one example of how incorporating biological insights with already  
344 existing abiotic data could improve the predictive power of climate models.  
345

346 To understand potential physiological drivers that link *Methanoregula* and predications of CH<sub>4</sub>  
347 flux, we conducted a genomic analysis of 107 dereplicated MUCG-derived and publicly  
348 available (i.e., GTDB, JGI) MAGs. *Methanoregula* encoded diverse metabolic strategies, the  
349 capacity for fixing nitrogen (nitrogenase), viral defense (CRISPR-Cas), and mechanisms to  
350 respond to fluctuating redox conditions (reactive oxygen species) (Figure 5B). *Methanoregula*  
351 are classically designated hydrogenotrophic<sup>44</sup>, which we broadly confirmed here (Figure 5B).  
352 We also report that some *Methanoregula* genomes encode genes for methylotrophic  
353 methanogenesis, specifically for the demethylation of methylated sulfides<sup>45</sup> and methoxylated<sup>19</sup>  
354 compounds, compounds prevalent in wetlands<sup>10,15</sup>. Although hydrogenotrophic methanogenesis  
355 is generally recognized as the dominant CH<sub>4</sub> -generating pathway in wetlands, recent studies  
356 have indicated that methylotrophic methanogenesis contributes more to CH<sub>4</sub> flux than previously  
357 realized<sup>17,21,46</sup>. Therefore, the apparent significance of *Methanoregula* in contributing to CH<sub>4</sub>  
358 emissions across diverse wetlands and within wetland gradients could partly be explained by a  
359 broader than previously understood ecological niche.  
360

361 To investigate the role of *Methanoregula* within a high CH<sub>4</sub> emitting wetland, we mined a  
362 previously undefined role for *Methanoregula* from 39 paired metatranscriptome and metabolome  
363 datasets across spatial and temporal gradients from a single mudflat at OWC<sup>10</sup> (Figure S6A). At  
364 this mud-type site, a *Methanoregula* MAG (OWC-0053) was one of the transcriptionally most  
365 active methanogens throughout the entire soil column across 3 months of peak CH<sub>4</sub> production  
366 (Figure 5C). This genome was also one of the 9 genomes that predicted 78% of soil porewater  
367 CH<sub>4</sub> concentration (Figure S6B). In summary, our comprehensive analysis reveals  
368 *Methanoregula*'s substantial contribution to CH<sub>4</sub> dynamics within a high-emission wetland,  
369 highlighting its prominent role as a key player in CH<sub>4</sub> production across spatial and temporal  
370 scales.



371  
372 These findings help in part explain the significant correlation between *Methanoregula* abundance  
373 and CH<sub>4</sub> flux across wetlands, and its role in marsh CH<sub>4</sub> networks. Our results suggest that  
374 *Methanoregula* may possess a broader physiological capacity to produce CH<sub>4</sub> and adapt to  
375 various abiotic and biotic constraints present in marsh soils. By shedding light on the functional  
376 significance of *Methanoregula*, a core taxon across wetlands, our study contributes to advancing  
377 our understanding of wetland CH<sub>4</sub> emissions. Our findings use a cross-site analysis to identify  
378 core lineages, like *Methanoregula*, warranting further physiological exploration, as the metabolic  
379 assumptions may be constrained by prior strict substrate and redox capabilities. Ultimately our  
380 results show promise for biological knowledge to enhance predictive models of wetland  
381 emissions, ultimately facilitating more effective management and mitigation strategies.

## 382 383 **Conclusions**

384 Microbial processes related to CH<sub>4</sub> flux have been well-characterized at a handful of individual  
385 sites. However, site-specific knowledge of wetland microbiomes suffers from limited  
386 generalizability, as wetland ecosystems vary widely. Therefore, insights gained from studying  
387 microbiomes in one wetland may not necessarily apply to others, restricting the broader  
388 understanding of wetland microbial communities and their roles in ecosystem processes. Here,  
389 we build on existing single-site studies by building a multisite wetlands database, and  
390 synthesizing decomposer and CH<sub>4</sub>-cycling networks and their relation to CH<sub>4</sub> flux data across  
391 multiple wetland ecosystems. Linking 16S rRNA gene data to genomes from the MUCC  
392 database, we developed metabolic profiles for methanogen-connected taxa. We found microbial  
393 cross-feeding has broad implications for CH<sub>4</sub> emissions across wetland environments.  
394 Additionally, the highest CH<sub>4</sub> emitting wetlands had the fewest methanogen network  
395 connections, suggesting streamlined metabolic circuits may contribute to enhanced CH<sub>4</sub>  
396 production across wetland soils. Finally, we revealed that *Methanoregula* is a key contributor to  
397 CH<sub>4</sub> flux in wetland environments, potentially due in part to previously unknown metabolic  
398 versatility. Ultimately, MUCC is a powerful microbiome tool enabling us to decode microbial  
399 organismal and metabolic patterns across multiple environments, with the goal of improving  
400 predictive modeling frameworks.

## 401 402 403 **Methods**

### 404 405 **Multi-Omics for Understanding Climate Change (MUCC) v2.0.0 Database**

406 Data was compiled from 9 different wetlands (5 marshes, 1 swamp, 1 fen, and 2 bogs), including  
407 both previously published and unpublished datasets. Published data were sourced from Old  
408 Woman Creek (OWC), AmeriFlux site-ID US-Twt (TWI), and SPRUCE; both published and  
409 unpublished data was compiled from Prairie Potholes Region (PPR 7, PPR 8) and Stordalen Mire  
410 (STM-fen and STM-bog); and unpublished data were collected from Jean Lafitte National  
411 Historical Park and Preserve (JLA) and AmeriFlux site US-LA2 (LA2). The Multi-Omics for  
412 Understanding Climate Change (MUCC) v2.0.0 database combines 997 16S rRNA, 284  
413 metagenomic, and 133 metatranscriptomic datasets from PPR, STM, OWC, TWI, and SPRUCE,  
414 along with 115 newly analyzed 16S rRNA and 20 metagenomic samples from PPR, JLA, and  
415 LA2. DNA extraction and amplicon sequencing info for all sites can be found in Table S7.  
416 Accession numbers for all samples can be found in Table S1, while sample IDs and GTDBk

417 v207 taxonomy for 16S rRNA data are in Table S2, and the details of 4,745 medium and high-  
418 quality Metagenome Assembled Genomes (MAGs) are listed in Table S3. The MAGs and 16S  
419 rRNA data from MUCC v2.0.0 are available on Zenodo (<https://zenodo.org/records/10822869>)  
420 and NCBI (PRJNA1007388).

421  
422 *Old Woman Creek (OWC)*

423 OWC National Estuarine Research Reserve (41° 22'N 82°30'W) is located on the southern shore  
424 of Lake Erie in Ohio. It is composed of a permanently flooded channel surrounded by marsh,  
425 occasional mud flats (which are inundated most of the time), and an upland forested habitat<sup>16</sup>. In  
426 brief, sediment cores were collected from sites representing distinct eco-hydrological patch types  
427 (cattail plant, mud, and open water) in triplicate in May, June, July, August, and September of  
428 2018 using a modified Mooring System soil corer<sup>16</sup>. Cores, sampled to a depth of 35cm, were  
429 sub-sectioned into six depths using a hydraulic extruder: 0-5 cm, 5-10 cm, 10-15 cm, 15-20 cm,  
430 20-25 cm, 25-30 cm. Microbiome data from 626 samples included bacterial and archaeal 16S  
431 rRNA amplicon sequence data, metagenomes, and metatranscriptomes<sup>10,16</sup>. Meteorological and  
432 eddy-covariance flux data for the site are available through AmeriFlux, site-ID US-OWC<sup>47</sup>. Gap-  
433 filled and averaged data used in this analysis were obtained from FLUXNET-CH4<sup>30</sup>.

434  
435 *Prairie Pothole Region (PPR)*

436 Cottonwood Lake Study Area (47° 05'N: 99° 06'W), located northwest of Jamestown, North  
437 Dakota, is a protected area owned by U. S. Fish and Wildlife Service and is a long-term research  
438 site (>30 years) for the U. S. Geological Survey (USGS). The 92-ha site consists of 17 distinct  
439 wetlands with permanent-to-temporary inundation. Samples were collected from two permanent  
440 wetlands: P8 (47° 05'55.8"N 99°06'14.1"W) and 2 sub-locations within P7 - Location 1  
441 (47°05'43.7"N 99°06'00.8"W) and Location 2 (47°05'46.7"N 99°05'57.9"W). Cores were  
442 collected in triplicate at each location in March, May, and September of 2015 using a modified  
443 Mooring System soil corer. Cores, sampled to a depth of 30 cm, were sub-sectioned using  
444 hydraulic extrusion in 3-cm increments. MUCC v 2.0.0 included 214 16S rRNA sequencing  
445 samples and 18 previously published metagenomes<sup>24</sup> combined with 18 new metagenomes from  
446 PPR.

447  
448 Annual CH<sub>4</sub> flux data was averaged from 2011-2016<sup>48</sup>. Methane fluxes were measured using the  
449 static chamber method<sup>49</sup> every two weeks during the growing season (defined as soil temperature  
450 ≥5 °C). During each sampling event, chambers were floated in open waters of P7 and P8 for 30  
451 minutes after which headspace gas samples were collected through a rubber septa and stored in  
452 evacuated 10-ml serum vials. Sample gases were analyzed for methane concentrations on a gas  
453 chromatograph equipped with electron capture and flame ionization detectors (SRI Model 8610,  
454 California) located at the USGS Northern Prairie Wildlife Research Center. Methane flux rates  
455 were calculated using the linear change in CH<sub>4</sub> concentration during the deployment, chamber  
456 dimensions and temperature, and the Ideal Gas Law. Biweekly flux rates were scaled to annual  
457 cumulative CH<sub>4</sub> flux by summing the mean flux rates between consecutive sampling events and  
458 multiplying by the time between events.

459  
460 *Louisiana Wetlands (JLA and LA2)*

461 Two distinct sites were sampled in Louisiana in October 2021. Jean Lafitte National Historical  
462 Park and Preserve (JLA) (29°80'18" N 90°11'02" W) and AmeriFlux site-ID US-LA2<sup>50</sup> (LA2)

463 (29°51'31.4" N, 90°17'11.3" W) on the Salvador Wildlife Management Area are located in  
464 coastal Louisiana. The JLA wetland is a Cypress-Tupello swamp with distinct hollow and  
465 hummock features, and the LA2 wetland is a fresh flotant marsh vegetated by a mix of *Typha sp.*  
466 and *Sagittaria sp.* In JLA, triplicate soil cores were collected using a Russian Peat Corer, and 0-  
467 10 cm and 30-40 cm intervals were sampled. In LA2, triplicate slurry samples from 0-10 cm and  
468 20-30 cm were collected using a sipper.

469  
470 Samples were kept on dry ice after processing. DNA was extracted using Zymo Research Quick-  
471 DNA™ Fecal/Soil Microbe Microprep Kit, following the manufacturer's protocol. Amplicon  
472 libraries were prepared using a single step PCR to amplify the V4 region of the 16S rRNA gene  
473 with the primers 515F/806R<sup>51</sup> following the Earth Microbiome Project (EMP) PCR protocol.  
474 Pooled DNA products were sequenced on the Illumina MiSeq Platform using 251 bp paired-end  
475 sequencing chemistry at the Microbial Community Sequencing Lab (University of Colorado  
476 Boulder).

477  
478 Gap-filled and averaged flux data for LA2 that were used here, were downloaded from  
479 FLUXNET-CH4<sup>30</sup>, while JLA flux was measured in four field campaigns in June, August,  
480 October, and December of 2021. Measurements were conducted using a trace gas analyzer  
481 (LICOR 7810) coupled to a custom-made chamber in triplicate 2-minute deployments in three  
482 hollow and three hummock locations. Flux was calculated following procedures described in  
483 Villa et al. 2021<sup>52</sup>.

484  
485 *Twitchell*  
486 Twitchell Island (121.65°W, 38.11°N), located in the Sacramento-San Joaquin River Delta, CA,  
487 hosts a USGS wetland restoration site. Meteorological and flux data for the site are available  
488 through AmeriFlux, site-ID US-Twt<sup>53</sup>. The Twitchell experimental wetlands are categorized as  
489 freshwater marsh. All data used from the Twitchell site were previously published in He et al<sup>27</sup>.  
490 Flux data was downloaded from FLUXNET-CH4<sup>30</sup>.

491  
492 *SPRUCE*  
493 The SPRUCE experiment (47°30.4760N; 93°27.1620W), located in the S1 bog of the US  
494 Department Agriculture (USDA) Forest Service's Marcell Experimental Forest, is located  
495 northeast of Grand Rapids, Minnesota. All data used was published in Wilson et al 2021<sup>22</sup>. In  
496 this study, only data from samples collected from +0 and ambient treatments were used.

497  
498 *Stordalen Mire (Stm)*  
499 Stordalen Mire (0°34'25.7"N; 37°34'30.1"E) located near Abisko, Sweden is an Arctic  
500 permafrost peatland that covers three main habitats across a discontinuous thaw gradient: palsa,  
501 bog, and fen. Palsa overlays intact permafrost and is well-drained and dominated by woody and  
502 ericaceous shrubs. Bog overlays partially thawed permafrost, with a perched water table and  
503 *Sphagnum* moss dominance. Fen is fully thawed, inundated, and sedge-dominated. The Mire was  
504 surveyed in 2015 at a range of distributed palsas, bogs and fens; only bog and fen 16S rRNA  
505 gene amplicon data are used in this study. A serrated knife was used to cut vertically into the  
506 peat, and microbial samples were collected to fill 2ml Eppendorf tubes from each depth:  
507 "shallow" (median of 2cm, range 1-3cm); "middle" (median of 12cm, range 10-12cm); and  
508 "deep" (median of 20cm, range 18-20cm). Sample tubes were stored on ice in the field and

509 transferred to -80C within 10 hours of collection. DNA was extracted with the PowerSoil 96-  
510 Well Soil DNA Isolation kit (MO BIO cat# 12955-4) following the manufacturer's protocol. 16S  
511 rRNA gene amplicon sequencing were performed by Argonne National Laboratory using the  
512 Earth Microbiome Project barcoded 515F-806R primer set and protocol, and on an Illumina  
513 MiSeq sequencer. MAGs from 214 previously published metagenomes were also used<sup>9</sup>. Methane  
514 flux data for Stordalen bogs and fens were annual averages from 2012-2018 of autochamber  
515 measurements (static, closed systems) that include three replicate measurements per cover type<sup>54</sup>.

516

### 517 **16S rRNA Gene Sequencing and Analysis**

518 All raw amplicon sequence data were processed using the QIIME2 (v2021.2) pipeline<sup>55</sup>. Data  
519 from OWC, PPR, LA2, JLA, STM-f, STM-b, and Spruce sites were independently processed  
520 through QIIME2 to account for sequencing run biases. Datasets were uniformly trimmed to the  
521 same length (195 bp), paired end read were merged, and ASVs assigned using the naïve Bayes  
522 sklearn classifier trained with the GTDB-Tk (v2.1.1 r207)<sup>56</sup>, prior to merging at the ASV level  
523 across datasets. Because Twitchell was sequenced using a different primer set, sites were merged  
524 at the genus level. Due to a wide range in sequencing depth across sites, all samples were  
525 rarefied to 5000 reads resulting in a final dataset of 1118 samples (Figure 1C). 43 samples were  
526 not retained because they fell below the minimum read depth. Across the 9 wetlands included in  
527 this study, core depth and interval sections varied. The compiled studies had different depth  
528 thresholds used to categorize shallow, middle, and deep sediments. To standardize depth  
529 measurements, we created 3 categories that encompassed the categories across studies: shallow  
530 included samples in the 0-9 cm horizon, middle included samples collected from 10-19 cm, and  
531 deep for samples collected from 20-40 cm.

532

533

### 534 **Genome assembly and binning**

535 Previously published metagenomic samples were combined with newly analyzed samples in this  
536 release of MUCC. 20 newly analyzed samples contributed 617 MAGs (Table S1 & S3). MAGs  
537 were recovered from:

- 538 (1) 2021 LA Field Sample (n=1)
- 539 (2) 2021 JLA Field Sample (n=1)
- 540 (3) 2022 PPR Field Sediment Samples (n=7)
- 541 (4) 2022 PPR Field Water Samples (n=2)
- 542 (5) 2022 PPR Lab Enrichment Samples (n=9)

543

544 LA and JLA metagenomes were processed separately from the PPR metagenomes. Raw  
545 metagenomic reads were trimmed using Sickle (pe)<sup>57</sup> and assemblies were generated using  
546 Megahit (v1.2.9)<sup>58</sup> with parameters --k-min 31 --k max 121 --k-step 10. Subsampled assemblies  
547 using 25% of sequencing reads were generated using IDBA-UD v 1.1.3<sup>59</sup> with default  
548 parameters. Reads were mapped to contigs greater than 2500 bp using BMap (v 38.89)<sup>60</sup> and  
549 were subsequently binned using MetaBAT2<sup>61</sup>. Only medium and high-quality bins based on  
550 adapted MIMARKS standards (completeness  $\geq 50\%$  and contamination  $< 10\%$ ) were retained<sup>62</sup>.  
551 PPR bins from these assemblies were combined with bins from metagenomic assemblies derived  
552 from earlier sampling of PPR<sup>28</sup>, were combined with the bins from LA2 and JLA, and with  
553 publicly available bins from OWC<sup>10</sup>, STM<sup>9</sup>, and TWI<sup>27</sup>. This bin pool was dereplicated using

554 dRep (v 3.0.0)<sup>63</sup> at 99% identity. MAG completeness and contamination was estimated using  
555 CheckM<sup>64</sup> and taxonomy assigned using GTDB-tk v2.3.0 with GTDB database release 207<sup>56</sup>.

556

## 557 **Community Analysis**

558 To determine the extent to which microbial community structure varied with both wetland type  
559 (marsh, swamp, fen, bog) and sample depth (shallow, mid, deep), we conducted permutational  
560 analysis of variance (PERMANOVA) using Bray-Curtis distances. Results were visualized using  
561 non-metric multidimensional scaling (NMDS). PERMANOVA and NMDS were conducted  
562 using the *vegan* package<sup>65</sup> and visualized using *ggplot2*<sup>66</sup> in R Studio<sup>66</sup>. We also correlated  
563 environmental parameters including pH, mean annual temperature, mean annual precipitation,  
564 latitude, longitude, and CH<sub>4</sub> flux with microbial community structure using the R-function *envfit*  
565 (as visualized in Figure S2). Alpha diversity of the entire microbial community, of  
566 methanotrophs and methanogens, of the methanogens only, and of the methanotrophs only was  
567 calculated using the Shannon diversity index. Differences in alpha diversity between bogs and  
568 fens were calculated using analysis of variance (ANOVA). Marshes and swamps were grouped  
569 together because they have similar characteristics to each other such as pH while bog and fen  
570 were grouped because they are both types of peatland characterized by low pH and occur in  
571 similar climates<sup>67</sup>. Shannon diversity was correlated with individual environmental parameters  
572 using a linear regression and *corrplot* in R. Linear models were used to assess if mean annual  
573 temperature (MAT) and/or relative abundance of *Methanoregula* was predictive of methane flux  
574 across wetlands using the *lm* function in R. MAT and *Methanoregula* relative abundance were  
575 also individually tested using a regression model conducted using the R-function *ggpubr*<sup>68</sup>.

576 To determine if certain methanogens and methanotrophs were widespread (found across all sites)  
577 or restricted to specific wetland types (i.e., marsh), we conducted a core community analysis.  
578 This analysis was conducted across all samples both regardless of sample depth, and within the  
579 depth categorization to understand if core members are more likely to be present in different  
580 depth zones. Because of the wide range of sampling schemes across sites, a microbe was  
581 determined to be a core member if it was present across all sites or all sites within a  
582 categorization (marsh/swamp or bog/fen). Core analysis was performed using ‘*summarise*’ and  
583 ‘*filter*’ commands in Tidyverse<sup>69</sup>.

## 584 **Co-occurrence Networks**

585 To understand if co-occurrence patterns related to methane flux, we created co-occurrence  
586 networks based on the entire community and significant co-occurrence patterns with  
587 methanogens from JLA, LA2, OWC, PPR 7, PPR 8. We focused on these five marsh sites  
588 because we were interested in patterns within the highest methane producing communities and  
589 because these all used the same amplicon primers. Because networks are sensitive to number of  
590 input samples, each individual site’s network was composed of 12 different community samples  
591 that were randomly sampled. Additionally, samples all came from similar points in the season  
592 (September or October) and represented all sampling depths.

593

594 Network analyses were carried out in R using the packages *igraph*<sup>70</sup>, *Hmisc*<sup>71</sup>, and *Matrix*<sup>72</sup>. To  
595 determine co-occurrence patterns in the microbial communities, we used rarefied genus tables.  
596 Genera with less than 10 read counts were removed from the analysis. We used Spearman



597 correlations to determine if genera were significantly correlated with a p-value cutoff of  $< 0.05$   
598 and rho of  $> 0.5$ . Gephi (0.10.1)<sup>73</sup> was used to visualize networks and calculate network  
599 parameters including number of edges, nodes, average degrees, average path length, and  
600 modularity. Network parameters were correlated to methane flux using *corrplot* and linear  
601 regressions in R. Given our interest in the metabolic interactions of microbial taxa with  
602 methanogens, we focused downstream analyses on positive interactions.

603  
604 To uncover the metabolic interactions patterns of the methanogens, co-occurrence networks were  
605 compared to MAGs in the MUCC database that had been assigned taxonomy using GTDB-Tk  
606 (v2.1.1 r207)<sup>56</sup>. Every MAG that appeared in the methanogen networks (determined if MAG and  
607 16S ID matched at the genus level) were compiled and annotated using DRAM (v1.4.4)<sup>74</sup>.  
608 MAGs were further physiologically curated using DRAM curations and manual analyses, and  
609 subsequently put into one of the following categories: Methanogen, methanotroph, fermenter,  
610 acetogen, methyl-x, or other (Table S5). Methanogens, methanotrophs, and fermenters were  
611 defined using the rules set published in Olivero et al<sup>10</sup>. Additional methanogens and  
612 methanotrophs were assigned if a MAG was not present for that genus but has been recognized  
613 in the literature. Acetogens were assigned if they had at least 6 out of 10 steps of the Wood-  
614 Ljungdahl pathway. Methyl-x were assigned based on the presence of known substrate-specific  
615 methylotrophic genes including both aerobic and anaerobic metabolisms. All rules are outlined  
616 in Table S4. If multiple MAGs existed for each genus, over 50% of the MAGs had to follow the  
617 rules laid out above for it to be classified within a given category.

618

### 619 **Phylogenomic and physiological analysis of *Methanoregula***

620

621 MAGs in the MUCC database were taxonomically assigned using GTDB-Tk (v2.1.1 r207)<sup>56</sup> and  
622 *Methanoregula* MAGs (n=37) were parsed by genus from the full database. Further, publicly-  
623 available *Methanoregula* MAGs were retrieved from GTDB (n=21) and JGI (n=91). These 149  
624 MAGs were dereplicated at 99% using dRep<sup>63</sup> in 107 representative MAGs. All MAGs were  
625 annotated using DRAM (v1.3.2)<sup>74</sup>.

626

627 Phylogenomic analysis of the 107 dereplicated *Methanoregula* MAGs was performed using  
628 GTDB-Tk v2.1.1 r207<sup>56</sup> run using the de novo workflow. The alignment was based on 53  
629 concatenated archaeal marker genes, and a GTDB-derived genome from the phylum  
630 Undinarchaeota (GCA\_002495465.1) was used as an outgroup to root the tree. The generated  
631 tree was read and visually modified, including the representation of physiological potential, in R  
632 using the ggtree package<sup>75</sup>. Newick tree is available at <https://zenodo.org/records/10822869>.

633

634 *Methanoregula* MAGs were screened for physiological potential for methanogenesis (*mcrABG*),  
635 hydrogenotrophy (genes encoding the Wood-Ljungdahl pathway), nitrogen fixation (nitrogenase)  
636 and CRISPR-Cas associated proteins using DRAM. Meanwhile, to search for possession of  
637 genes encoding reactive oxygen species (ROS) detoxification enzymes, MAGs were searched via  
638 BLAST-P using a FASTA reference file (<https://zenodo.org/records/10822869>) of Uniprot and  
639 KEGG-derived reference sequences of ROS detox enzymes methanogens are known to  
640 encode<sup>76</sup>. The BLAST-P output was limited to include only hits with both a bitscore of  $\geq 100$  and  
641  $\geq 30\%$  identity to the target sequence. Last, to curate methylotrophic potential, we carried out the  
642 strategy used by Ellenbogen *et al.*<sup>15</sup>. MAGs were searched via BLAST-P using a FASTA

643 reference file<sup>15</sup> of known methylotrophic genes, namely those encoding substrate-specific  
644 corrinoid-dependent three component methyltransferase systems comprised of a  
645 substrate:corrinoid methyltransferase, a corrinoid-binding protein, a methylcorrinoid:carbon-  
646 carrier methyltransferase, and a reductive activase. The BLASTP output was limited to only  
647 include hits with a bitscore >60, and only genes from MAGs found to possess genes for directly  
648 substrate-interacting substrate:corrinoid methyltransferases were retained. Genes meeting these  
649 criteria were phylogenetically analyzed using ProtPipeliner to build RaxML trees  
650 (<https://github.com/TheWrightonLab/Protpipeliner/blob/master/protpipeliner.py>) relative to  
651 reference genes including those used in the BLAST-P search, plus other homologous sequences  
652 derived from UniProt from physiologically characterized methylotrophic methanogens and  
653 acetogens (Table S2 tab FASTA\_reference\_for\_genes\_trees ). Newick trees are available at  
654 <https://zenodo.org/records/10822869>. Trees were visually inspected in iTOL<sup>77</sup>, and tree  
655 placement – plus gene synteny, as methylotrophic genes are often co-encoded<sup>78,79</sup> - was used to  
656 confirm or refine the specific identification of genes.

657

### 658 **Metatranscriptomic analyses**

659 Metatranscriptome analyses was performed using a previously published normalized read count  
660 table<sup>10</sup>. In brief, raw metatranscriptomic reads were quality trimmed, mapped to MUCC v 1.0.0,  
661 per gene read counts were estimated, and resulting read counts were normalized to gene length  
662 and TMM normalized using log<sub>2</sub> normalization<sup>80</sup>. Mean geTMM values for all genes were  
663 summed for each MAG, to generate a total expression metric for each MAGs activity within the  
664 2018 OWC metatranscriptomes. Only metatranscriptome data from mud type sites are included  
665 in these analyses. These MAG totals were further summed to the level of genus, and the  
666 methanogen data were parsed out of the full data set by taxonomy. It was manually determined  
667 which 5 methanogenic genera were most active in the D1 (0-5 cm), D3 (10-15 cm), and D6 (20-  
668 30 cm) samples independent of time. The genus-summed mean total transcription of these 5  
669 methanogenic genera over time was plotted in R using ggplot<sup>66</sup>. To represent the activity of  
670 individual MAGs over time and depth, the mean MAG-level summed geTMM scores were  
671 plotted as a heatmap using ggplot in R.

672

### 673 **Variable Importance (VIP) scores**

674 Variable importance scores (VIP) are used to estimate a variables contribution to PLS regression,  
675 with predictors assigned high scores considered important for the PLS prediction of the tested  
676 response variable. Here, VIP were calculated as per Chong et al.<sup>81</sup> in R to correlate methanogen  
677 MAG activity – or genome expression- and field methane data. To generate methane data, a  
678 numerical model was used to combine chamber and peeper measurements to determine the rates  
679 of methane production as outlined in Angle et al<sup>16</sup>. For MAG activity, the aforementioned  
680 summed average MAG activity table (see above) was used. Significant VIP scores (>2) were  
681 plotted using ggplot in R.

682

### 683 **Acknowledgements**

684 This work was partially supported by awards from the National Science Foundation (NSF) grants  
685 EAR-2029686 (EKB, MJW), DEB-1754756 (JEK) and PRFB-2109592 (AMO) and U.S.  
686 Department of Energy (DOE) Office of Science, Office of Biological and Environmental  
687 Research (BER) grants DE-SC0023084 (EKB, JBE, DKMF, SB, EJW, GB, MAB, KCW, MJW),  
688 DE-SC0021350 (MAB, KCW), *DE-SC000054* (DKMF, EJW, GB, KCW), DE-SC0023456

689 (VXR, RKV) and contributions by JEK were funded by DE-SC0007144, DE SC0012088,  
690 and DE-SC0023297. Metagenomic and metatranscriptomic sequencing was performed at the  
691 Joint Genome Institute under a Community Science Program and the University of Colorado  
692 Anschutz's Genomics Shared Resource. The work (proposal ID: 504205, 505780) conducted by  
693 the U.S. Department of Energy Joint Genome Institute (<https://ror.org/04xml1d337>), a DOE  
694 Office of Science User Facility, is supported by the Office of Science of the U.S. Department of  
695 Energy operated under Contract No. DE-AC02-05CH11231. Work conducted at the Genomics  
696 Shared Resource at University of Colorado was supported by the Cancer Center Support Grant  
697 (P30CA046934).

698

699

## 700 CITATIONS

701

702 1. Poulter, B. *et al.* Global wetland contribution to 2000–2012 atmospheric methane growth

703 rate dynamics. *Environ. Res. Lett.* **12**, 094013 (2017).

704 2. Rosentreter, J. A. *et al.* Half of global methane emissions come from highly variable aquatic

705 ecosystem sources. *Nat. Geosci.* **14**, 225–230 (2021).

706 3. Bridgham, S. D., Cadillo-Quiroz, H., Keller, J. K. & Zhuang, Q. Methane emissions from

707 wetlands: biogeochemical, microbial, and modeling perspectives from local to global scales.

708 *Global Change Biology* **19**, 1325–1346 (2013).

709 4. Laanbroek, H. J. Methane emission from natural wetlands: interplay between emergent

710 macrophytes and soil microbial processes. A mini-review. *Annals of Botany* **105**, 141–153

711 (2010).

712 5. Jackson, R. B. *et al.* Increasing anthropogenic methane emissions arise equally from

713 agricultural and fossil fuel sources. *Environ. Res. Lett.* **15**, 071002 (2020).

714 6. Saunois, M. *et al.* The Global Methane Budget 2000–2017. *Earth System Science Data* **12**,

715 1561–1623 (2020).

716 7. Conrad, R. Importance of hydrogenotrophic, acetoclastic and methylotrophic methanogenesis

717 for methane production in terrestrial, aquatic and other anoxic environments: A mini review.

718 *Pedosphere* **30**, 25–39 (2020).

- 719 8. Smith, G. J. & Wrighton, K. C. Metagenomic Approaches Unearth Methanotroph  
720 Phylogenetic and Metabolic Diversity. *Current Issues in Molecular Biology* **33**, 57–84  
721 (2019).
- 722 9. Woodcroft, B. J. *et al.* Genome-centric view of carbon processing in thawing permafrost.  
723 *Nature* **560**, 49–54 (2018).
- 724 10. Oliverio, A. M. *et al.* Rendering the metabolic wiring powering wetland soil methane  
725 production. 2024.02.06.579222 Preprint at <https://doi.org/10.1101/2024.02.06.579222>  
726 (2024).
- 727 11. Vanwonterghem, I. *et al.* Methylophilic methanogenesis discovered in the archaeal phylum  
728 Verstraetearchaeota. *Nat Microbiol* **1**, 1–9 (2016).
- 729 12. Nobu, M. K., Narihiro, T., Kuroda, K., Mei, R. & Liu, W.-T. Chasing the elusive  
730 Euryarchaeota class WSA2: genomes reveal a uniquely fastidious methyl-reducing  
731 methanogen. *ISME J* **10**, 2478–2487 (2016).
- 732 13. Kumar, M. *et al.* Novel methanotrophic and methanogenic bacterial communities from  
733 diverse ecosystems and their impact on environment. *Biocatalysis and Agricultural*  
734 *Biotechnology* **33**, 102005 (2021).
- 735 14. Vaksmaa, A. *et al.* Distribution and activity of the anaerobic methanotrophic community in a  
736 nitrogen-fertilized Italian paddy soil. *FEMS Microbiology Ecology* **92**, fiw181 (2016).
- 737 15. Ellenbogen, J. B. *et al.* Methylophilicity in the Mire: direct and indirect routes for methane  
738 production in thawing permafrost. *mSystems* **0**, e00698-23 (2023).
- 739 16. Angle, J. C. *et al.* Methanogenesis in oxygenated soils is a substantial fraction of wetland  
740 methane emissions. *Nat Commun* **8**, 1567 (2017).

- 741 17. Narrowe, A. B. *et al.* Uncovering the Diversity and Activity of Methylophilic Methanogens  
742 in Freshwater Wetland Soils. *mSystems* **4**, e00320-19 (2019).
- 743 18. Liu, Y. & Whitman, W. B. Metabolic, Phylogenetic, and Ecological Diversity of the  
744 Methanogenic Archaea. *Annals of the New York Academy of Sciences* **1125**, 171–189 (2008).
- 745 19. Kurth, J. M. *et al.* Methanogenic archaea use a bacteria-like methyltransferase system to  
746 demethoxylate aromatic compounds. *ISME J* **15**, 3549–3565 (2021).
- 747 20. McCalley, C. K. *et al.* Methane dynamics regulated by microbial community response to  
748 permafrost thaw. *Nature* **514**, 478–481 (2014).
- 749 21. Tveit, A. T., Urich, T., Frenzel, P. & Svenning, M. M. Metabolic and trophic interactions  
750 modulate methane production by Arctic peat microbiota in response to warming. *Proc Natl*  
751 *Acad Sci U S A* **112**, E2507–E2516 (2015).
- 752 22. Wilson, R. M. *et al.* Soil metabolome response to whole-ecosystem warming at the Spruce  
753 and Peatland Responses under Changing Environments experiment. *Proceedings of the*  
754 *National Academy of Sciences* **118**, e2004192118 (2021).
- 755 23. Wilson, R. M. *et al.* Microbial Community Analyses Inform Geochemical Reaction Network  
756 Models for Predicting Pathways of Greenhouse Gas Production. *Front. Earth Sci.* **7**, (2019).
- 757 24. Dalcin Martins, P. *et al.* Abundant carbon substrates drive extremely high sulfate reduction  
758 rates and methane fluxes in Prairie Pothole Wetlands. *Glob Change Biol* **23**, 3107–3120  
759 (2017).
- 760 25. Delwiche, K. B. *et al.* FLUXNET-CH<sub>4</sub>: a global, multi-ecosystem dataset and analysis of  
761 methane seasonality from freshwater wetlands. *Earth System Science Data* **13**, 3607–3689  
762 (2021).



- 763 26. Chang, K.-Y. *et al.* Substantial hysteresis in emergent temperature sensitivity of global  
764 wetland CH<sub>4</sub> emissions. *Nat Commun* **12**, 2266 (2021).
- 765 27. He, S. *et al.* Patterns in wetland microbial community composition and functional gene  
766 repertoire associated with methane emissions. *mBio* **6**, e00066-00015 (2015).
- 767 28. Dalcin Martins, P. *et al.* Viral and metabolic controls on high rates of microbial sulfur and  
768 carbon cycling in wetland ecosystems. *Microbiome* **6**, 138 (2018).
- 769 29. Kellner, E. *Wetlands – Different Types, Their Properties and Functions.* (2003).
- 770 30. Delwiche, K. B. *et al.* FLUXNET-CH<sub>4</sub>: a global, multi-ecosystem dataset and analysis of  
771 methane seasonality from freshwater wetlands. *Earth System Science Data* **13**, 3607–3689  
772 (2021).
- 773 31. Juottonen, H. *et al.* Methanogen communities and Bacteria along an ecohydrological  
774 gradient in a northern raised bog complex. *Environmental Microbiology* **7**, 1547–1557  
775 (2005).
- 776 32. Seward, J. *et al.* Peatland Microbial Community Composition Is Driven by a Natural Climate  
777 Gradient. *Microb Ecol* **80**, 593–602 (2020).
- 778 33. Shade, A. & Stopnisek, N. Abundance-occupancy distributions to prioritize plant core  
779 microbiome membership. *Current Opinion in Microbiology* **49**, 50–58 (2019).
- 780 34. Custer, G. F., Gans, M., van Diepen, L. T. A., Dini-Andreote, F. & Buerkle, C. A.  
781 Comparative Analysis of Core Microbiome Assignments: Implications for Ecological  
782 Synthesis. *mSystems* **8**, e01066-22 (2023).
- 783 35. Shade, A. & Handelsman, J. Beyond the Venn diagram: the hunt for a core microbiome.  
784 *Environmental Microbiology* **14**, 4–12 (2012).

- 785 36. Esson, K. C. *et al.* Alpha- and Gammaproteobacterial Methanotrophs Codominate the Active  
786 Methane-Oxidizing Communities in an Acidic Boreal Peat Bog. *Applied and Environmental*  
787 *Microbiology* **82**, 2363–2371 (2016).
- 788 37. Singleton, C. M. *et al.* Methanotrophy across a natural permafrost thaw environment. *ISME J*  
789 **12**, 2544–2558 (2018).
- 790 38. Wrighton, K. C. *et al.* Metabolic interdependencies between phylogenetically novel  
791 fermenters and respiratory organisms in an unconfined aquifer. *ISME J* **8**, 1452–1463 (2014).
- 792 39. Wüst, P. K., Horn, M. A. & Drake, H. L. Trophic links between fermenters and methanogens  
793 in a moderately acidic fen soil. *Environ Microbiol* **11**, 1395–1409 (2009).
- 794 40. Schink, B. Energetics of syntrophic cooperation in methanogenic degradation. *Microbiology*  
795 *and Molecular Biology Reviews* **61**, 262–280 (1997).
- 796 41. Karekar, S., Stefanini, R. & Ahring, B. Homo-Acetogens: Their Metabolism and  
797 Competitive Relationship with Hydrogenotrophic Methanogens. *Microorganisms* **10**, 397  
798 (2022).
- 799 42. Li, D. *et al.* Coexistence patterns of soil methanogens are closely tied to methane generation  
800 and community assembly in rice paddies. *Microbiome* **9**, 20 (2021).
- 801 43. Yang, S. *et al.* In-depth analysis of core methanogenic communities from high elevation  
802 permafrost-affected wetlands. *Soil Biology and Biochemistry* **111**, 66–77 (2017).
- 803 44. Garcia, P. S., Gribaldo, S. & Borrel, G. Diversity and Evolution of Methane-Related  
804 Pathways in Archaea. *Annu Rev Microbiol* (2022) doi:10.1146/annurev-micro-041020-  
805 024935.
- 806 45. Fu, H. & Metcalf, W. W. Genetic Basis for Metabolism of Methylated Sulfur Compounds in  
807 *Methanosarcina* Species. *Journal of Bacteriology* **197**, 1515–1524 (2015).

- 808 46. Zalman, C. A. *et al.* Methylo-trophic methanogenesis in Sphagnum-dominated peatland soils.  
809 *Soil Biology and Biochemistry* **118**, 156–160 (2018).
- 810 47. Bohrer, G. & Kerns, J. AmeriFlux BASE US-OWC Old Woman Creek, Ver. 4-5, AmeriFlux  
811 AMP (Dataset). <https://doi.org/10.17190/AMF/1418679> (2023).
- 812 48. Tangen, B. A. & Bansal, S. Soil properties and greenhouse gas fluxes of Prairie Pothole  
813 Region wetlands: a comprehensive data release: U.S. Geological Survey data release.  
814 <https://doi.org/10.5066/F7KS6QG2> (2019).
- 815 49. Bansal, S. *et al.* Practical Guide to Measuring Wetland Carbon Pools and Fluxes. *Wetlands*  
816 **43**, 105 (2023).
- 817 50. Ward, E., Merino, S., Stagg, C. & Krauss, K. AmeriFlux BASE US-LA2 Salvador WMA  
818 Freshwater Marsh, Ver. 3-5, AmeriFlux AMP, (Dataset).  
819 <https://doi.org/10.17190/AMF/1543387> (2023).
- 820 51. Caporaso, J. G. *et al.* Ultra-high-throughput microbial community analysis on the Illumina  
821 HiSeq and MiSeq platforms. *ISME J* **6**, 1621–1624 (2012).
- 822 52. Villa, J. A. *et al.* Ebullition dominates methane fluxes from the water surface across different  
823 ecohydrological patches in a temperate freshwater marsh at the end of the growing season.  
824 *Science of The Total Environment* **767**, 144498 (2021).
- 825 53. Knox, S., Matthes, J. H., Verfaillie, J. G. & Baldocchi, D. AmeriFlux BASE US-Twt  
826 Twitchell Island, Ver. 7-5, AmeriFlux AMP, (Dataset).  
827 <https://doi.org/10.17190/AMF/1246140> (2023).
- 828 54. Holmes, M. E. *et al.* Carbon Accumulation, Flux, and Fate in Stordalen Mire, a Permafrost  
829 Peatland in Transition. *Global Biogeochemical Cycles* **36**, e2021GB007113 (2022).

- 830 55. Bolyen, E. *et al.* Reproducible, interactive, scalable and extensible microbiome data science  
831 using QIIME 2. *Nature Biotechnology* **37**, 852–857 (2019).
- 832 56. Chaumeil, P.-A., Mussig, A. J., Hugenholtz, P. & Parks, D. H. GTDB-Tk: a toolkit to  
833 classify genomes with the Genome Taxonomy Database. *Bioinformatics* **36**, 1925–1927  
834 (2020).
- 835 57. Joshi, N. & Fass, J. Sickle: A sliding-window, adaptive, quality-based trimming tool for  
836 FastQ files. (2011).
- 837 58. Li, D., Liu, C.-M., Luo, R., Sadakane, K. & Lam, T.-W. MEGAHIT: an ultra-fast single-  
838 node solution for large and complex metagenomics assembly via succinct de Bruijn graph.  
839 *Bioinformatics* **31**, 1674–1676 (2015).
- 840 59. Peng, Y., Leung, H. C. M., Yiu, S. M. & Chin, F. Y. L. IDBA-UD: a de novo assembler for  
841 single-cell and metagenomic sequencing data with highly uneven depth. *Bioinformatics* **28**,  
842 1420–1428 (2012).
- 843 60. Bushnell, B. *BBMap: A Fast, Accurate, Splice-Aware Aligner*.  
844 <https://www.osti.gov/biblio/1241166> (2014).
- 845 61. Kang, D. D. *et al.* MetaBAT 2: an adaptive binning algorithm for robust and efficient  
846 genome reconstruction from metagenome assemblies. *PeerJ* **7**, e7359 (2019).
- 847 62. Bowers, R. M. *et al.* Minimum information about a single amplified genome (MISAG) and a  
848 metagenome-assembled genome (MIMAG) of bacteria and archaea. *Nat Biotechnol* **35**, 725–  
849 731 (2017).
- 850 63. Olm, M. R., Brown, C. T., Brooks, B. & Banfield, J. F. dRep: a tool for fast and accurate  
851 genomic comparisons that enables improved genome recovery from metagenomes through  
852 de-replication. *ISME J* **11**, 2864–2868 (2017).

- 853 64. Parks, D. H., Imelfort, M., Skennerton, C. T., Hugenholtz, P. & Tyson, G. W. CheckM:  
854 assessing the quality of microbial genomes recovered from isolates, single cells, and  
855 metagenomes. *Genome Res* **25**, 1043–1055 (2015).
- 856 65. Oksanen, J. *et al.* vegan: Community Ecology Package. (2019).
- 857 66. Wickham, H. *Ggplot2: Elegant Graphics for Data Analysis*. (Springer-Verlag New York,  
858 2016).
- 859 67. Beverley Clarkson & Peterson, M. Wetland types. in *Wetland restoration: a handbook for*  
860 *New Zealand freshwater systems* 26–38 (2010).
- 861 68. Kassambara, A. ggpubr: ‘ggplot2’ Based Publication Ready Plots. (2023).
- 862 69. Welcome to the Tidyverse. <https://tidyverse.tidyverse.org/articles/paper.html>.
- 863 70. Csardi, G. & Nepusz, T. The igraph software package for complex network research.  
864 *InterJournal Complex Systems*, 1695 (2006).
- 865 71. Harrell, F. Hmisc: Harrell Miscellaneous. (2021).
- 866 72. Bates, D. & Maechler, M. Sparse and Dense Matrix Classes and Methods. (2021).
- 867 73. Bastian, M., Heymann, S. & Jacomy, M. Gephi: An Open Source Software for Exploring and  
868 Manipulating Networks. *Proceedings of the International AAAI Conference on Web and*  
869 *Social Media* **3**, 361–362 (2009).
- 870 74. Shaffer, M. *et al.* DRAM for distilling microbial metabolism to automate the curation of  
871 microbiome function. *Nucleic Acids Research* **48**, 8883–8900 (2020).
- 872 75. Yu, G., Smith, D. K., Zhu, H., Guan, Y. & Lam, T. T.-Y. ggtree: an r package for  
873 visualization and annotation of phylogenetic trees with their covariates and other associated  
874 data. *Methods in Ecology and Evolution* **8**, 28–36 (2017).



- 875 76. Jasso-Chávez, R. *et al.* Air-Adapted *Methanosarcina acetivorans* Shows High Methane  
876 Production and Develops Resistance against Oxygen Stress. *PLOS ONE* **10**, e0117331  
877 (2015).
- 878 77. Letunic, I. & Bork, P. Interactive Tree Of Life (iTOL) v4: recent updates and new  
879 developments. *Nucleic Acids Research* **47**, W256–W259 (2019).
- 880 78. Ellenbogen, J. B., Jiang, R., Kountz, D. J., Zhang, L. & Krzycki, J. A. The MttB superfamily  
881 member MtyB from the human gut symbiont *Eubacterium limosum* is a cobalamin-  
882 dependent  $\gamma$ -butyrobetaine methyltransferase. *J Biol Chem* **297**, 101327 (2021).
- 883 79. Kountz, D. J., Behrman, E. J., Zhang, L. & Krzycki, J. A. MtcB, a member of the MttB  
884 superfamily from the human gut acetogen *Eubacterium limosum*, is a cobalamin-dependent  
885 carnitine demethylase. *J Biol Chem* **295**, 11971–11981 (2020).
- 886 80. Smid, M. *et al.* Gene length corrected trimmed mean of M-values (GeTMM) processing of  
887 RNA-seq data performs similarly in intersample analyses while improving intrasample  
888 comparisons. *BMC Bioinformatics* **19**, 236 (2018).
- 889 81. Chong, I.-G. & Jun, C.-H. Performance of some variable selection methods when  
890 multicollinearity is present. *Chemometrics and Intelligent Laboratory Systems* **78**, 103–112  
891 (2005).

892  
893  
894  
895  
896  
897  
898  
899  
900  
901  
902  
903

904 **Figures**

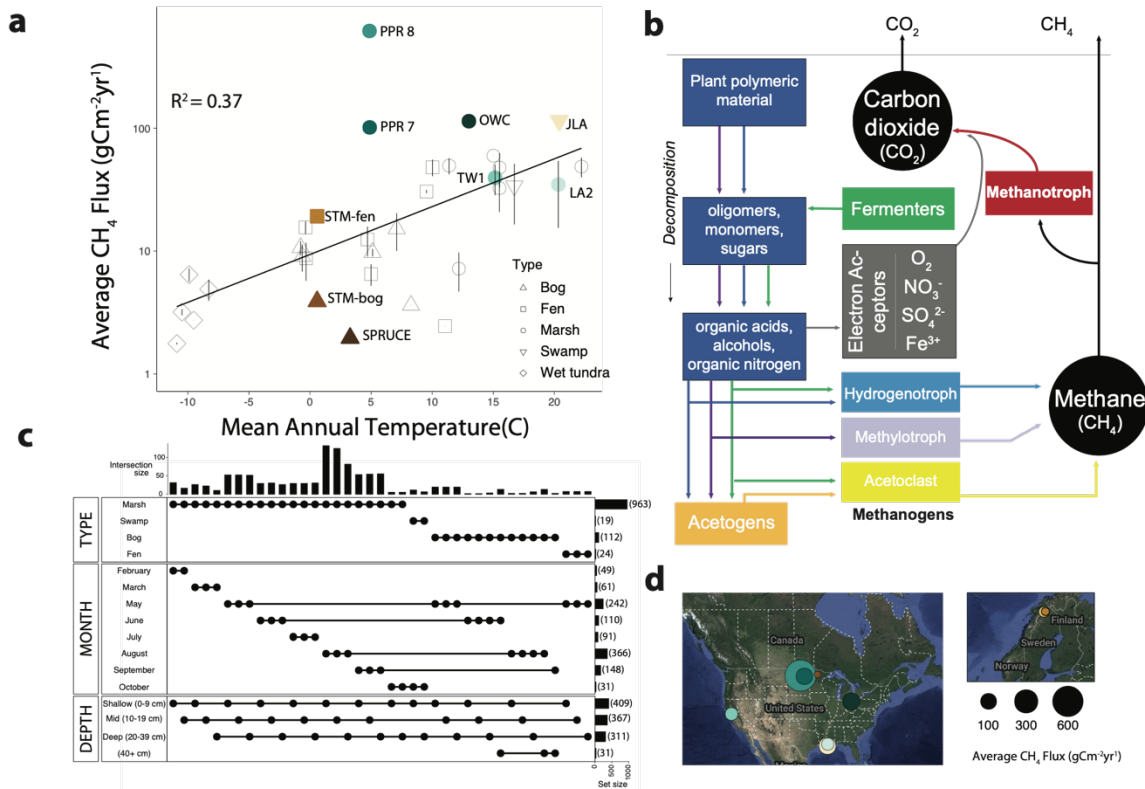

905  
 906 **Figure 1.** (A) Figure modified from Delwiche et al. (2021) shows mean annual methane ( $\text{CH}_4$ )  
 907 flux from wetlands included in FLUXNET- $\text{CH}_4$ . The deviation of the predictions from  
 908 observations indicates this abiotic variable incompletely represented  $\text{CH}_4$  flux, especially for the  
 909 highest emitting wetlands. Colored points represent sites discussed in this study. (B) Methane  
 910 emissions in wetlands result from decomposition networks in which carbon decomposers first  
 911 produce methanogenic substrates. These substrates are subsequently utilized by methanogenic  
 912 archaea to produce  $\text{CH}_4$ , which can either be consumed by methanotrophic bacteria or released  
 913 into the atmosphere. Methanogens produce  $\text{CH}_4$  through three distinct pathways characterized by  
 914 their substrate use: (1) hydrogenotrophic methanogenesis (reduce  $\text{CO}_2$  using  $\text{H}_2$ , formate,  
 915 ethanol, propanol, butanol – given in green and blue), (2) acetoclastic methanogenesis (acetate  
 916 given in dark yellow or green), or (3) methylotrophic methanogenesis ( $\text{CH}_3$  groups cleaved from  
 917 methanol or methylated amines, like trimethylamine - given in dark purple) (C) Upset plot  
 918 indicates the total number of samples and their distribution across relevant categories including  
 919 wetland type, sampling month, sampling depth. (D) Wetlands differ by type, annual methane  
 920 flux, and geographic and climatic factors. Circle size approximates annual  $\text{CH}_4$ . Circle area flux  
 921 of proposed wetland and geographic location.

922  
 923

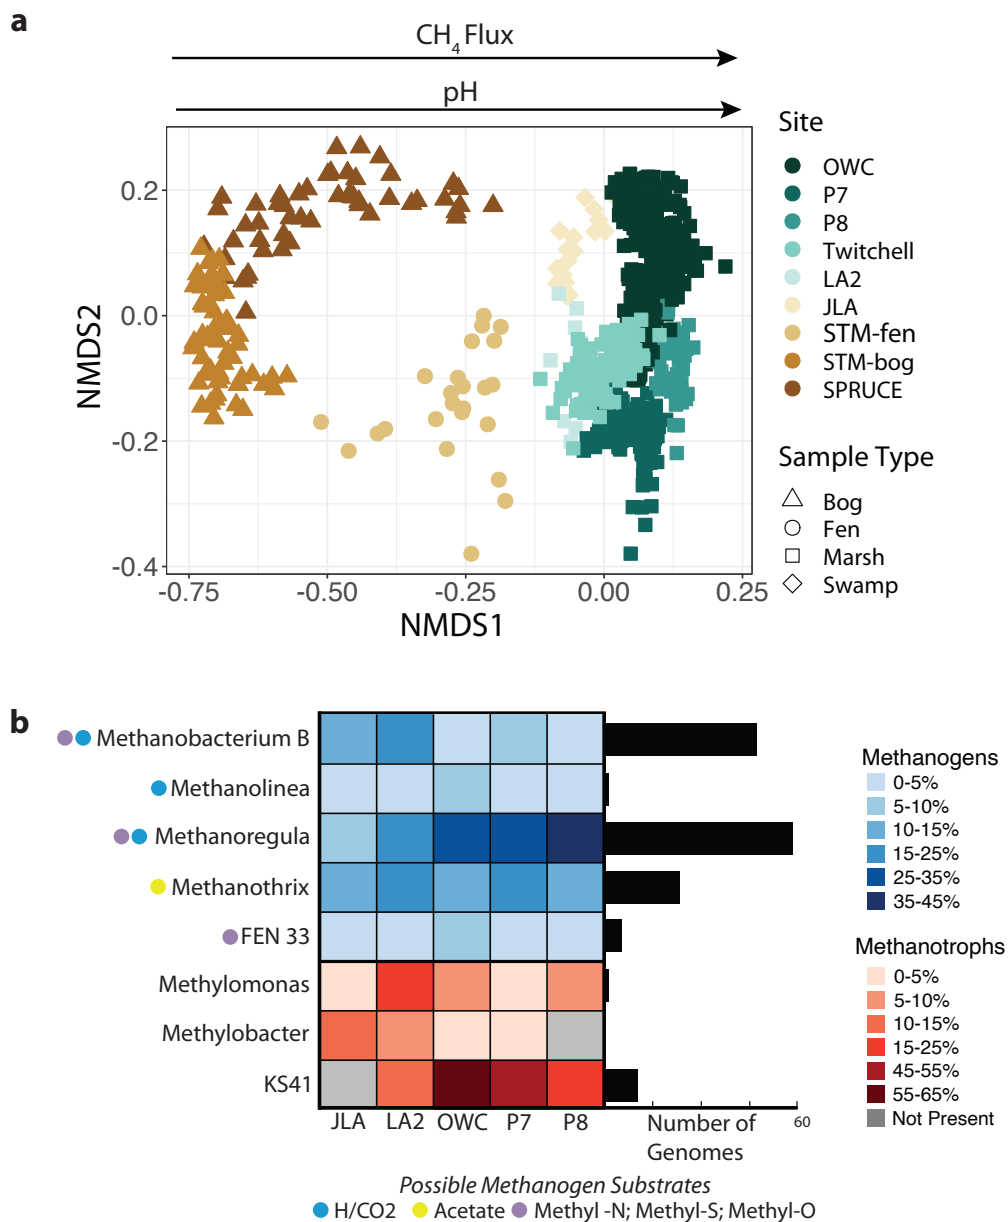

924  
 925 **Figure 2.** (A) Wetland type is an important control on microbiome membership and structure,  
 926 despite differences in sampling strategies and geographic locations. 16S rRNA amplicon data on  
 927 soil microbial communities from marsh and swamp samples cluster together (rectangles and  
 928 diamonds, most right side) and are statistically distinct from fen (triangle, middle and most left  
 929 side) and bog (circle, middle) microbial communities. (B) Core methane cycling members across  
 930 distinct wetlands. Heatmap shows the relative abundance of each genus within the methanogen  
 931 (blue) or methanotroph (red) community across wetlands. To illuminate the metabolic features of  
 932 these core taxa in high methane emitting wetlands, we utilized the Multi-Omics for  
 933 Understanding Climate Change (MUCC) v 2.0.0 database, with 140 MAGs assigned to our core  
 934 taxa. Genome counts per genus are shown in the bar chart (black).

935

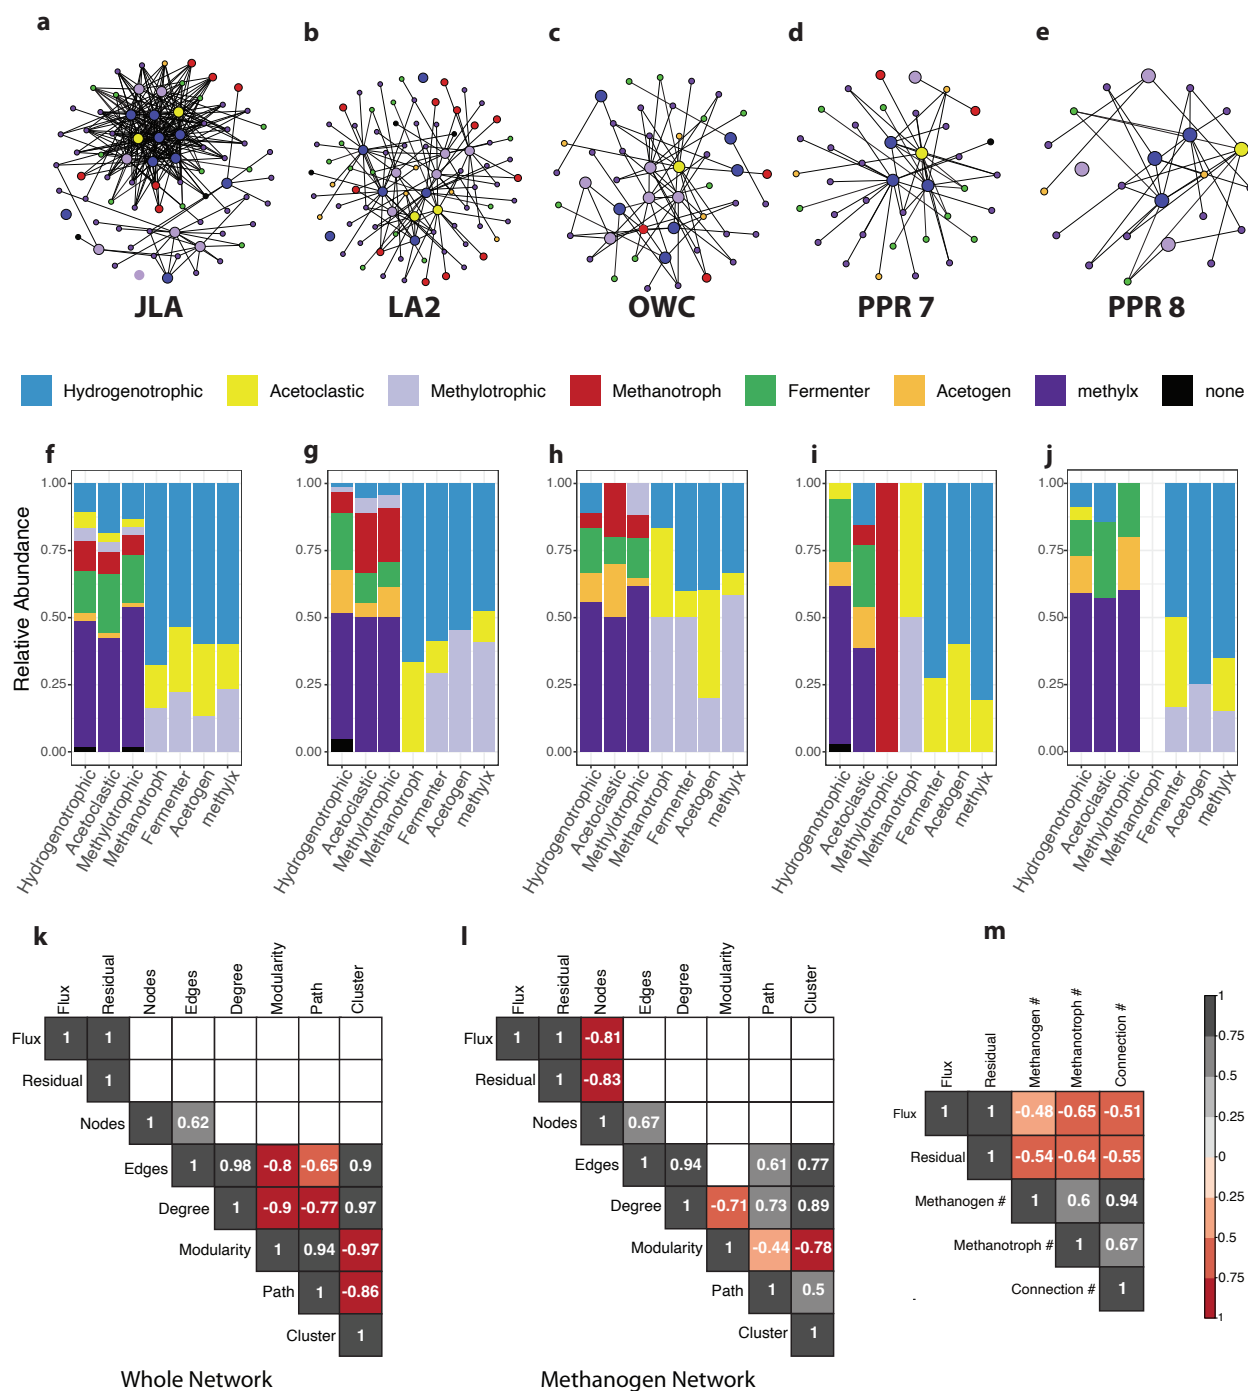

936

937

938

939

940

941

942

943

944

**Figure 3.** (A-E) Co-occurrence network analysis revealed network structure of methanogen associated taxa across wetlands. Networks depicting site specific co-occurrence analysis uncovered the network of microorganisms coordinated to methanogens across each site, with nodes representing microbial taxa. Larger nodes represent methanogens, while small nodes represent bacterial taxa. Nodes are colored by inferred metabolic potential of 16S rRNA linked MAGs within MUCC. (F-J) Proportion of connections between groups in each network are given in the bar charts below and show conserved patterns in network connections across sites. Missing bars indicate no connections. Correlation between network statistics and methane flux

945 measurements derived from the Ameriflux network was measured for (K) whole community  
 946 networks and (L) methanogen networks. Only number of nodes in the methanogen network was  
 947 correlated with methane flux. (M) Additionally, negative correlation between annual methane  
 948 residual and methane flux (from Figure 1) to number of methanogens, methanotrophs, and  
 949 connections between the two were observed.  
 950  
 951

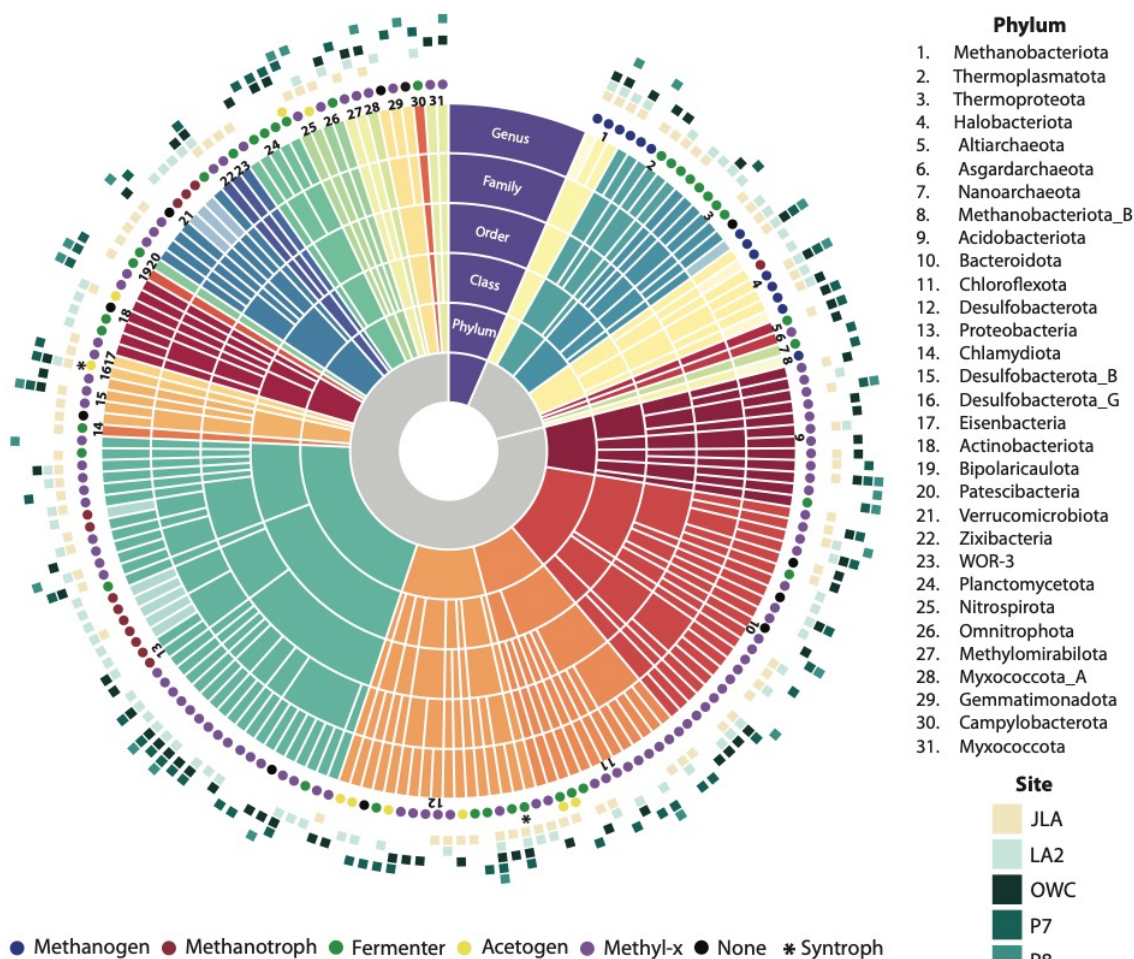

952  
 953  
 954 **Figure 4.** Taxonomy of the 158 genera represented in the networks that are found within the  
 955 MUCC database. Additionally, 6 methanogens and 9 methanotrophs were identified based on  
 956 16S rRNA were included in the networks and are shown in the network with reduced opacity at  
 957 the genus level. Circles around the edge represent inferred metabolic potential and squares  
 958 represent the sites where the genus had significant co-occurrence with a methanogen.  
 959  
 960  
 961  
 962  
 963  
 964



965

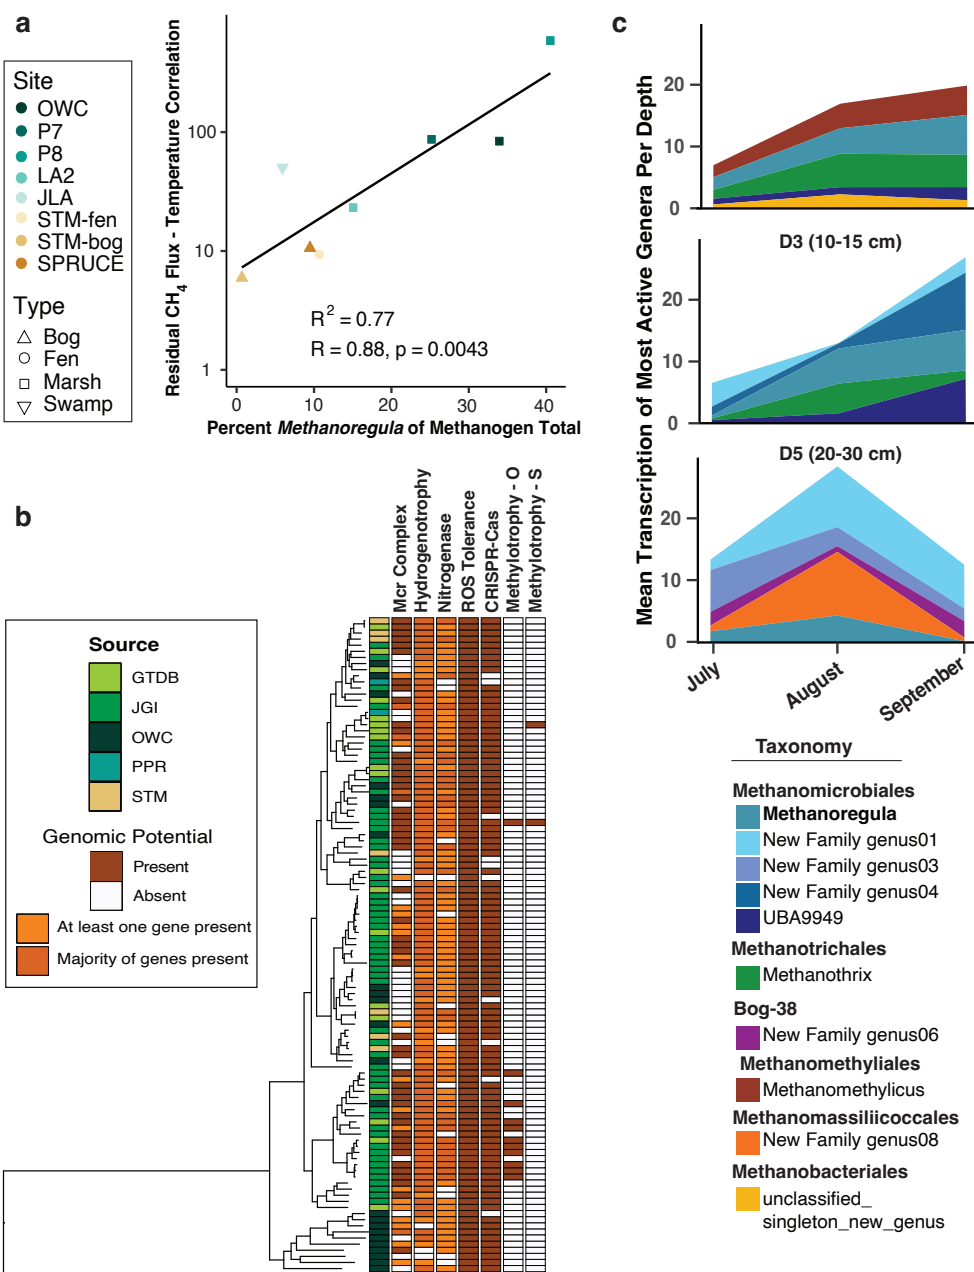

966

967

968

969 **Figure 5.** (A) Residual values from the methane flux to temperature trend line was significantly

970 related to the relative abundance of *Methanoregula* within the methanogen community. (B)

971 Genome tree of *Methanoregula* MAGs from MUCC (OWC, PPR, STM), plus available MAGS

972 from JGI and GTDB. A pangenome-analysis shows the largely conserved encoding of genes for

973 key physiological features, as well as limited novel metabolic potential (e.g., methylotrophic

974 genes) which may directly or indirectly support high methane fluxes from *Methanoregula* in

975 wetlands. (C) Mean transcription of top five most active methanogenic genera at three depths (0-

976 5 cm, 10-15 cm, 20-30 cm) in the mud site type across the 2018 sampling season. predictive of

977  $\text{CH}_4$  fluxes.

978 **Supplementary Information**

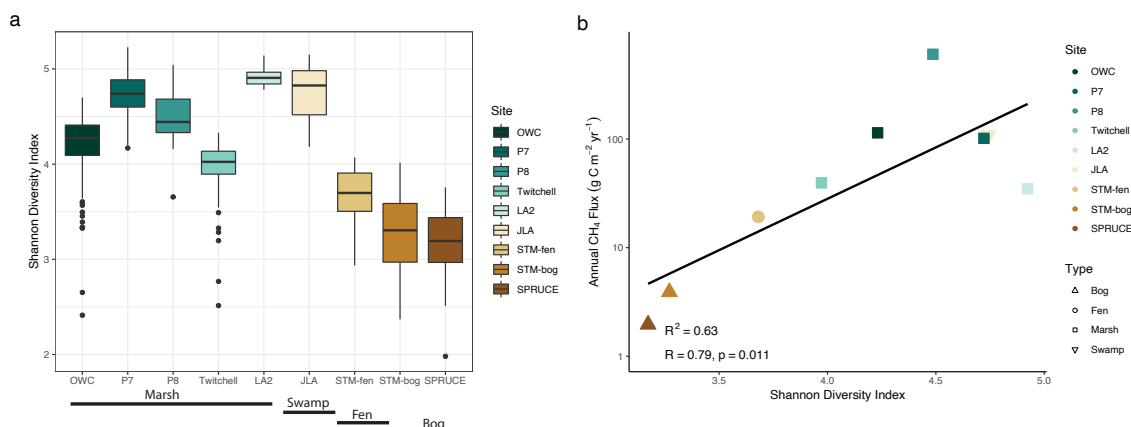

979 **Figure S1.** (A) Alpha diversity measured using the Shannon diversity index of the total  
980 community was significantly higher in swamps and marshes compared to bog and fen ( $p < 0.001$ ).  
981 (B) Total community alpha diversity was significantly correlated with annual CH<sub>4</sub> flux.  
982  
983  
984  
985  
986

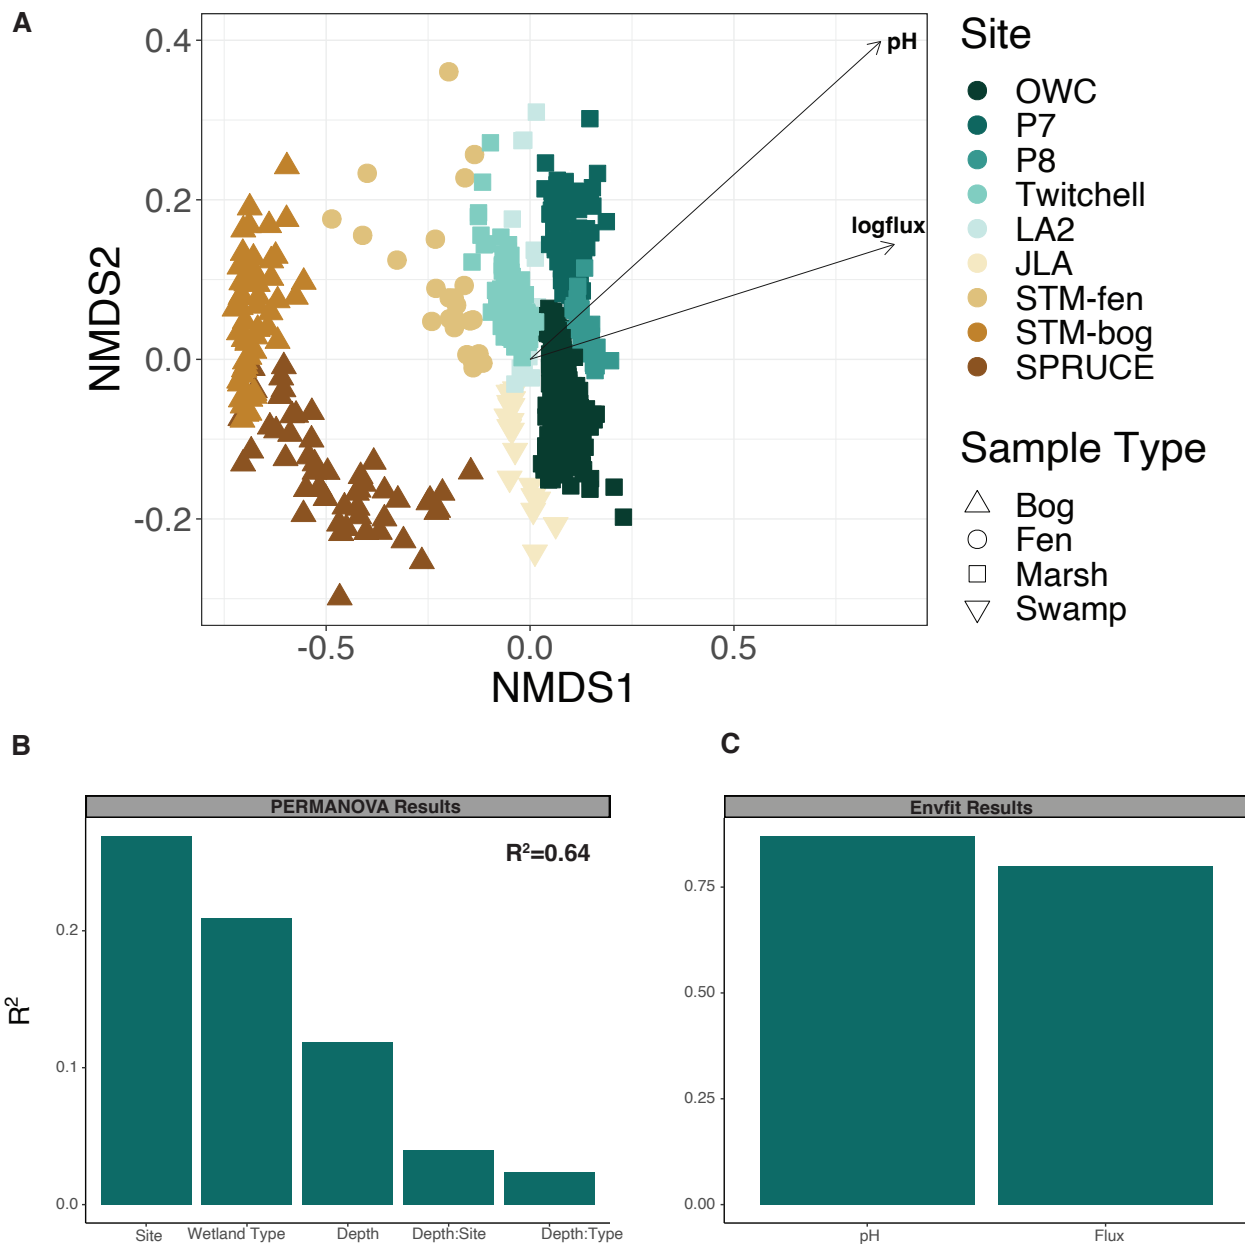

### Environmental Predictors of Microbial Communities

987  
 988 **Figure S2.** Wetland type and pH are dominant drivers of microbial communities. (A) Nonmetric  
 989 multidimensional scaling (NMDS) ordination of wetland communities was overlaid with  
 990 significant environmental variables using envfit. (B) Barplot visualizing the relative importance  
 991 of environmental factors that explain variation in the microbial communities. (C) Higher pH and  
 992 CH<sub>4</sub> flux were correlated with microbial communities from marsh sites.

993  
 994  
 995  
 996  
 997  
 998

A.

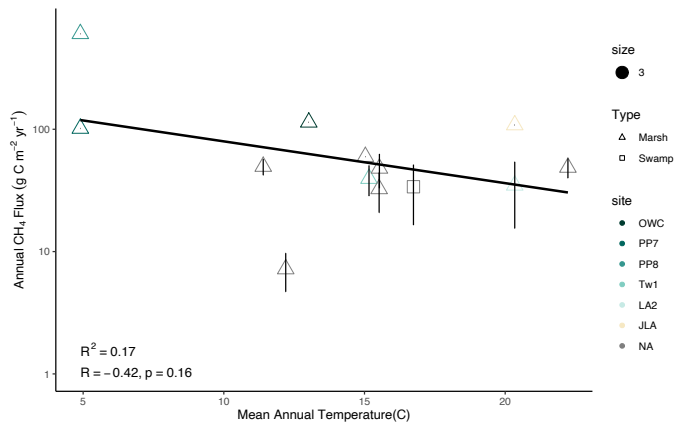

999  
1000

B.

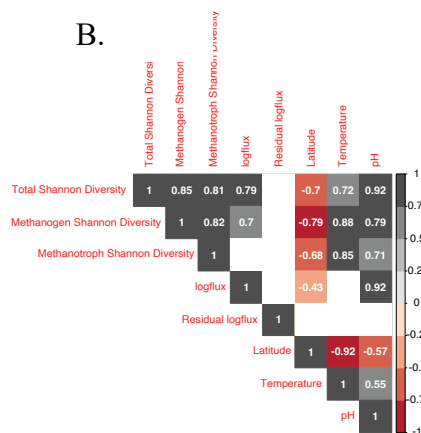

1001

C.

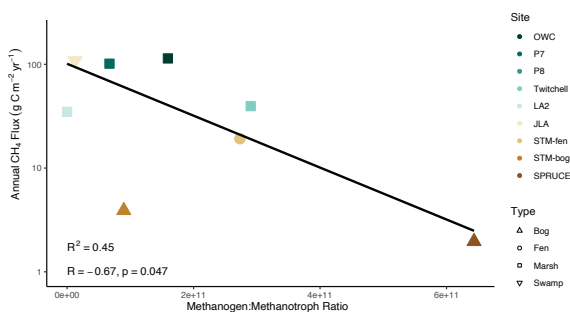

1002  
1003  
1004  
1005  
1006  
1007  
1008  
1009

**Figure S3.** (A) Temperature alone has relatively low predictive power of CH<sub>4</sub> flux in marshes and swamps. Mean annual temperature of all marsh and swamp found in Delwiche et al. (2021) and in our dataset were compared annual CH<sub>4</sub> flux. (B) Correlation plot comparing environmental variables to CH<sub>4</sub> flux and Shannon diversity. White boxes with no value indicates no significant correlation between variables. (C) The ratio of methanogen to methanotroph relative abundance is significantly correlated to CH<sub>4</sub> flux.

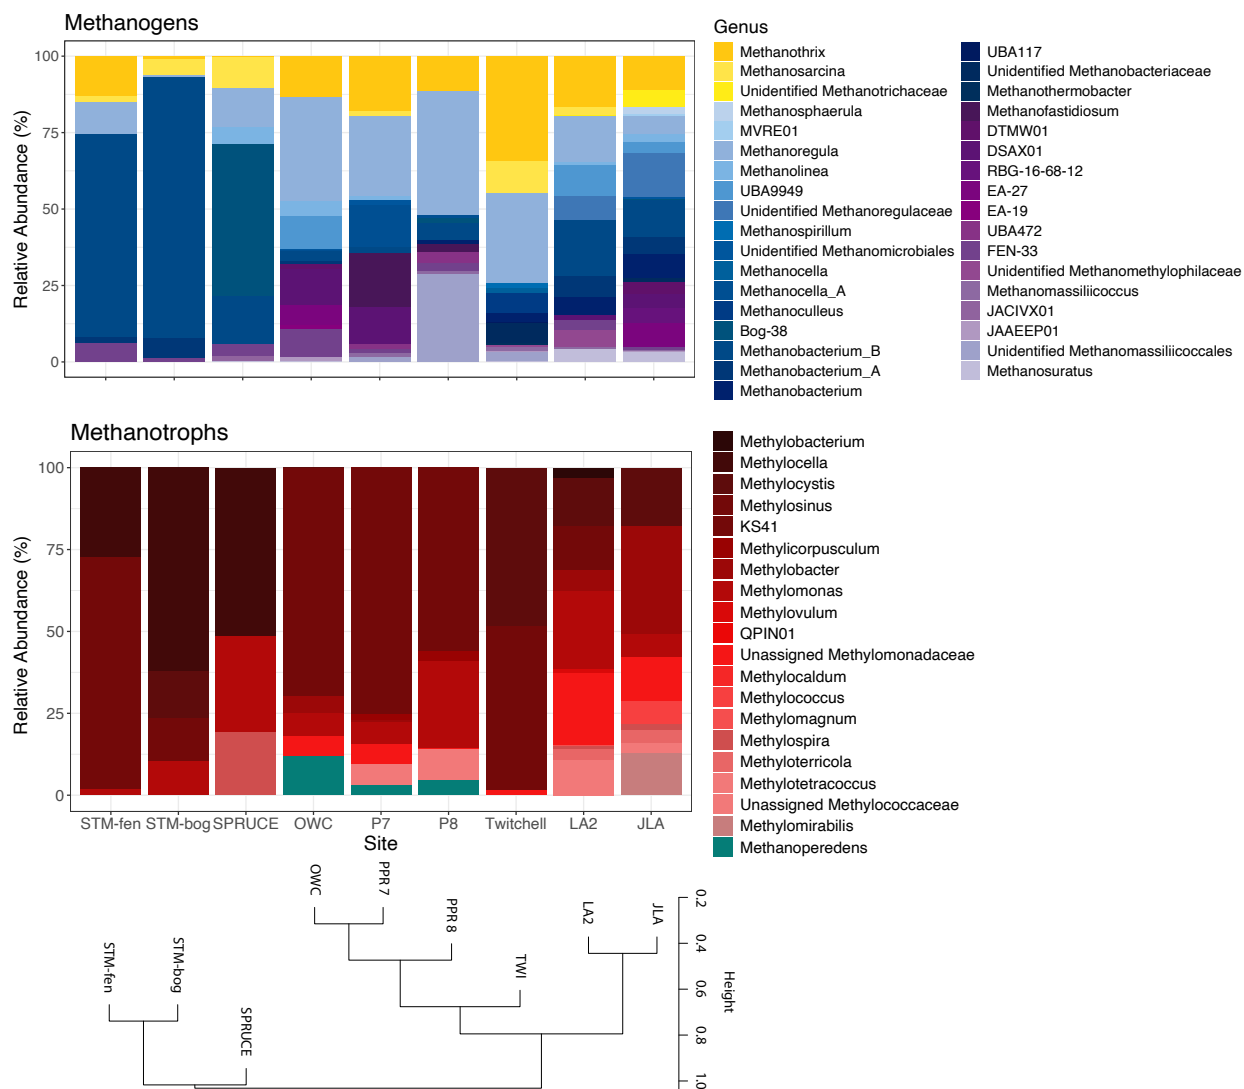

1010  
 1011 **Figure S4.** Across 9 wetlands, the highest methane emitting wetlands (PPR P7, OWC)  
 1012 similar methane microbial communities despite differences in geography. Amplicon taxonomic  
 1013 data were mined for known methanogen or methanotroph membership and relative abundance.  
 1014 Dominant and prevalent methanogen genera include *Methanoregula* and *Methanothrix*.  
 1015 Methanogens are colored by pathway where acetoclastic methanogens are given in yellow,  
 1016 hydrogenotrophic methanogens in blue and methylotrophic methanogens in purple. Aerobic  
 1017 methanotrophs are given in red while anaerobic methanotrophs are given in teal.  
 1018  
 1019  
 1020

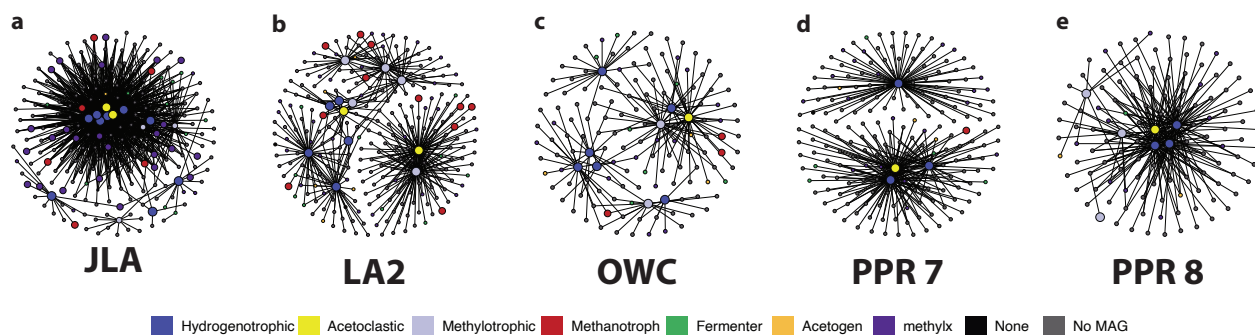

1021  
 1022 **Figure S5.** 16S rRNA gene co-occurrence networks at each site were built for the methanogen  
 1023 community. Networks were constructed to comprise all significant co-occurrences that included  
 1024 a methanogen.  
 1025  
 1026

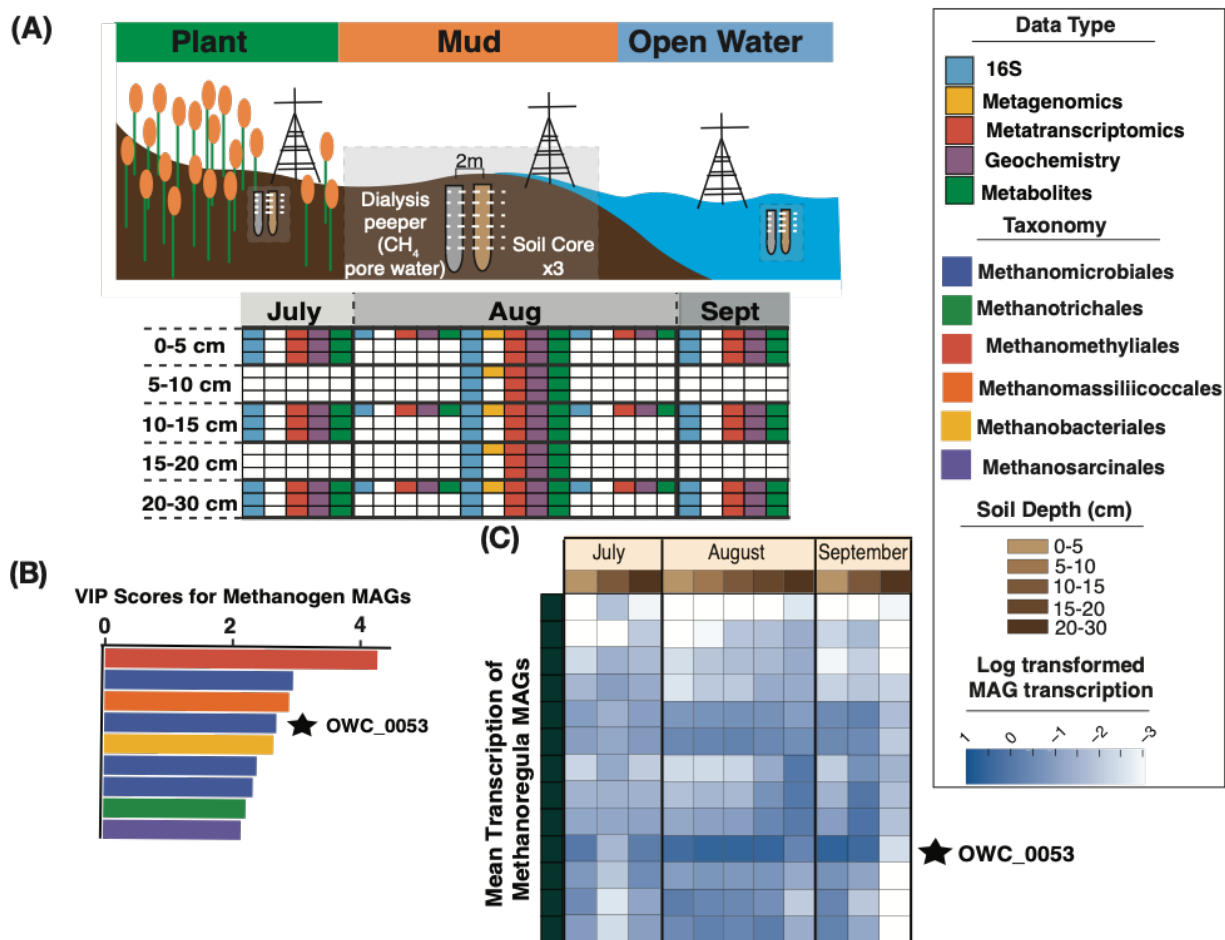

1027



1028 **Figure S6.** (A) Illustration representing our 2018 sampling campaign in OWC, here used as a  
1029 case study for exploring the significance of *Methanoregula* in a single wetland. (B) Significant  
1030 VIP scores (>2) for methanogen MAGs found predictive of CH<sub>4</sub> fluxes in OWC, including a  
1031 member of the *Methanoregula* (starred, OWC\_0053). (B) Mean transcription of *Methanoregula*  
1032 MAGs across time and depth in OWC in the mud site type. Members of the genus are active  
1033 across the site, with the most active MAG representing the sole one found to be significantly  
1034 predictive of CH<sub>4</sub> fluxes.

1035  
1036  
1037  
1038

### 1039 **SI Citations**

- 1040 1. Oliverio, A. M. *et al.* Rendering the metabolic wiring powering wetland soil methane  
1041 production. 2024.02.06.579222 Preprint at <https://doi.org/10.1101/2024.02.06.579222>  
1042 (2024).
- 1043 2. Angle, J. C. *et al.* Methanogenesis in oxygenated soils is a substantial fraction of wetland  
1044 methane emissions. *Nat Commun* **8**, 1567 (2017).
- 1045 3. Narrowe, A. B. *et al.* Uncovering the Diversity and Activity of Methylotrophic Methanogens  
1046 in Freshwater Wetland Soils. *mSystems* **4**, e00320-19 (2019).
- 1047 4. Narrowe, A. B. *et al.* Complex Evolutionary History of Translation Elongation Factor 2 and  
1048 Diphthamide Biosynthesis in Archaea and Parabasalids. *Genome Biol Evol* **10**, 2380–2393  
1049 (2018).
- 1050 5. Dalcin Martins, P., Frank, J., Mitchell, H., Markillie, L. M. & Wilkins, M. J. Wetland  
1051 Sediments Host Diverse Microbial Taxa Capable of Cycling Alcohols. *Appl Environ*  
1052 *Microbiol* **85**, (2019).
- 1053 6. He, S. *et al.* Patterns in wetland microbial community composition and functional gene  
1054 repertoire associated with methane emissions. *mBio* **6**, e00066-00015 (2015).
- 1055 7. Woodcroft, B. J. *et al.* Genome-centric view of carbon processing in thawing permafrost.  
1056 *Nature* **560**, 49–54 (2018).

- 1057 8. Dalcin Martins, P. *et al.* Abundant carbon substrates drive extremely high sulfate reduction  
1058 rates and methane fluxes in Prairie Pothole Wetlands. *Glob Change Biol* **23**, 3107–3120  
1059 (2017).
- 1060 9. Wilson, R. M. *et al.* Soil metabolome response to whole-ecosystem warming at the Spruce  
1061 and Peatland Responses under Changing Environments experiment. *Proceedings of the*  
1062 *National Academy of Sciences* **118**, e2004192118 (2021).
- 1063 10. Ellenbogen, J. B. *et al.* Methylotrophy in the Mire: direct and indirect routes for methane  
1064 production in thawing permafrost. *mSystems* **0**, e00698-23 (2023).
- 1065 11. Guerrero-Cruz, S. *et al.* Methanotrophs: Discoveries, Environmental Relevance, and a  
1066 Perspective on Current and Future Applications. *Frontiers in Microbiology* **12**, (2021).
- 1067 12. Shin, J., Song, Y., Jeong, Y. & Cho, B.-K. Analysis of the Core Genome and Pan-Genome of  
1068 Autotrophic Acetogenic Bacteria. *Front Microbiol* **7**, 1531 (2016).
- 1069 13. Andreesen, J. R. Glycine reductase mechanism. *Current Opinion in Chemical Biology* **8**,  
1070 454–461 (2004).
- 1071 14. Rajakovich, L. J., Fu, B., Bollenbach, M. & Balskus, E. P. Elucidation of an anaerobic  
1072 pathway for metabolism of l-carnitine–derived  $\gamma$ -butyrobetaine to trimethylamine in human  
1073 gut bacteria. *Proceedings of the National Academy of Sciences* **118**, e2101498118 (2021).
- 1074 15. Massmig, M. *et al.* Carnitine metabolism in the human gut: characterization of the two-  
1075 component carnitine monooxygenase CntAB from *Acinetobacter baumannii*. *J Biol Chem*  
1076 **295**, 13065–13078 (2020).
- 1077 16. Koeth, R. A. *et al.*  $\gamma$ -Butyrobetaine Is a Proatherogenic Intermediate in Gut Microbial  
1078 Metabolism of L-Carnitine to TMAO. *Cell Metabolism* **20**, 799–812 (2014).

- 1079 17. Craciun, S. & Balskus, E. P. Microbial conversion of choline to trimethylamine requires a  
1080 glycyl radical enzyme. *Proc Natl Acad Sci U S A* **109**, 21307–21312 (2012).
- 1081 18. Bazire, P. *et al.* Characterization of l-Carnitine Metabolism in *Sinorhizobium meliloti*.  
1082 *Journal of Bacteriology* **201**, 10.1128/jb.00772-18 (2019).
- 1083 19. Wargo, M. J. & Meadows, J. A. Carnitine in bacterial physiology and metabolism.  
1084 *Microbiology* **161**, 1161–1174 (2015).
- 1085 20. Wargo, M. J., Szwegold, B. S. & Hogan, D. A. Identification of Two Gene Clusters and a  
1086 Transcriptional Regulator Required for *Pseudomonas aeruginosa* Glycine Betaine  
1087 Catabolism. *Journal of Bacteriology* **190**, 2690–2699 (2008).
- 1088 21. Kumar, R. *et al.* Prediction and Biochemical Demonstration of a Catabolic Pathway for the  
1089 Osmoprotectant Proline Betaine. *mBio* **5**, 10.1128/mbio.00933-13 (2014).
- 1090 22. Cronin, D. & Institute, N. E. B. I. Metagenome-assembled genomes (MAGs) from Stordalen  
1091 Mire, Sweden. Zenodo <https://doi.org/10.5281/zenodo.7596016> (2023).
- 1092 23. Kurth, J. M., Op den Camp, H. J. M. & Welte, C. U. Several ways one goal—  
1093 methanogenesis from unconventional substrates. *Appl Microbiol Biotechnol* **104**, 6839–6854  
1094 (2020).
- 1095 24. Lü, Z. & Lu, Y. Complete Genome Sequence of a Thermophilic Methanogen, *Methanocella*  
1096 *conradii* HZ254, Isolated from Chinese Rice Field Soil. *Journal of Bacteriology* **194**, 2398–  
1097 2399 (2012).
- 1098 25. Borrel, G. *et al.* *Methanomethylophilus alvi* gen. nov., sp. nov., a Novel Hydrogenotrophic  
1099 Methyl-Reducing Methanogenic Archaea of the Order Methanomassiliicoccales Isolated  
1100 from the Human Gut and Proposal of the Novel Family Methanomethylophilaceae fam. nov.  
1101 *Microorganisms* **11**, 2794 (2023).

- 1102 26. Theisen, A. R. & Murrell, J. C. Facultative Methanotrophs Revisited. *Journal of*  
1103 *Bacteriology* **187**, 4303–4305 (2005).
- 1104 27. Cozannet, M. *et al.* New Insights into the Ecology and Physiology of  
1105 Methanomassiliicoccales from Terrestrial and Aquatic Environments. *Microorganisms* **9**, 30  
1106 (2020).
- 1107 28. Liu, Y.-F. *et al.* Anaerobic Degradation of Paraffins by Thermophilic Actinobacteria under  
1108 Methanogenic Conditions. *Environ. Sci. Technol.* **54**, 10610–10620 (2020).
- 1109  
1110  
1111  
1112
